# Supplementary material for: A Temporal Association between Accumulated Petrol (Gasoline) Lead Emissions and Motor Neuron Disease in Australia
Source: Int J Environ Res Public Health. 2015 Dec 19;12(12):16124–35. doi: 10.3390/ijerph121215047 (PMC4690983; doi:10.3390/ijerph121215047)
Supplement: Supplementary File 1 [file ijerph-12-15047-s001.xlsx]

## Sheet: Title
	Welcome to the GRIM books 2013
	General Record of Incidence of Mortality workbooks
	Motor neurone disease (ICD-10 G12.2), 1959–2013
	Contents
		Explanatory notes
		Graphs
		Interactive summary tables
		Summary measures
		Deaths
		Rates
		Populations
	For more information contact:				deaths@aihw.gov.au

## Sheet: Explanatory notes
	Motor neurone disease (ICD-10 G12.2), 1959–2013
	Data sources, methods and explanatory notes
	Data sources
	Suggested citation
	Australian Institute of Health and Welfare (AIHW) 2015. GRIM (General Record of Incidence of Mortality) books 2013: Motor neurone disease. Canberra: AIHW.
	Mortality data
	1. Information about deaths is collected on death certificates and certified by either a medical practitioner or a coroner. Registration of deaths is compulsory in Australia and is the responsibility of each state and territory Registrar of Births, Deaths and Marriages under jurisdiction specific legislation. On behalf of the Registrars, deaths data are assembled, coded and published by statistic…
	2. Causes of death are coded by the ABS to the International Statistical Classification of Diseases and Related Health Problems (ICD).
	3. Deaths in this workbook are counted according to year of registration of death, not necessarily the year in which the death occurred.
	4. Deaths registered in 2011 and earlier are based on the final version of cause of death data; deaths registered in 2012 and 2013 are based on the revised and preliminary versions, respectively and are subject to further revision by the ABS.
	5. Data for 2010 have not been adjusted for the additional deaths arising from outstanding registrations of deaths in Queensland in 2010. For more detail please refer to Technical note 3 in Causes of death, Australia, 2010 (ABS cat. no. 3303.0).
	6. For more information about Australian mortality data, including scope and coverage of the collection and a quality declaration, please refer to Deaths, Australia (ABS cat. no. 3302.0) and Causes of death, Australia (ABS cat. no. 3303.0) available from the ABS website.
	Population data
	Australian estimated resident population are sourced from Australian demographic statistics (ABS cat. no. 3101.0) and Australian historical population statistics (ABS cat. no. 3104.0.65.001).
	Methods
	Classification and coding
	Data for Motor neurone disease (G12.2) are from the ICD-10 chapter All diseases of the nervous system (G00–G99).
	ICD version and years	ICD codes
	ICD-1 1907–1917
	ICD-2 1918–1921
	ICD-3 1922–1930
	ICD-4 1931–1939
	ICD-5 1940–1949
	ICD-6 1950–1957
	ICD-7 1958–1967	356
	ICD-8 1968–1978	348
	ICD-9 1979–1996	335.2
	ICD-10 1997–present	G12.2
	Special notes:
	None.
	Comparability factor:	Comparability factor notes:
	1.13	None.
	The comparability factor is used to adjust 1979-1996 (ICD-9 coded) data to post-1997 (ICD-10) standards (see below for further information).
	Rates
	1. Rates are expressed as deaths per 100,000 population.
	2. Age-specific and crude rates are based on the most recent version of the Australian estimated resident population as at 30 June of the reference year available to AIHW at the time of preparing these workbooks.
	3. Age-standardised rates are rates that have been adjusted using a common standard age structure. In Australia, rates are commonly standardised to the 2001 Australian estimated resident population, but they can also be standardised to other populations. See below for the different standards presented in this workbook.
	Summary measures (in Summary measures worksheet)
	Total deaths: number of deaths registered in the reference year.
	Crude rate: number of deaths for a given year and cause of death, per 100,000 population, based on the Australian estimated resident population on 30 June of that year.
	Age-standardised rates: rates that are standardised to a specific standard age structure to facilitate comparison between populations and over time. Age-standardised rates using commonly used standard populations are included as follows:
	Australian standard (2001): directly age-standardised rates adjusted using the current Australian standard population (that is, the non-recast Australian estimated resident population (ERP) as at 30 June 2001).
	Adjusted by comparability factor: directly age-standardised rates (to the Australian standard population (2001)) that have been adjusted to reflect the coding standard changes between ICD-9 and ICD-10. Note: Australian deaths data for 1979–1996 are coded to the ICD-9 and deaths from 1997 onward are coded to the ICD-10. To adjust for this break in time series, a comparability factor can be applied…
	OECD standard (2010): directly age-standardised rates adjusted using the 2010 Organisation for Economic Co-operation and Development (OECD) standard population.
	WHO world standard: directly age-standardised rates adjusted using the World Health Organization (WHO) standard population.
	Segi world standard: directly age-standardised rates adjusted using the Segi world standard population.
	Mean age at death: For years 1964 onward, mean age at death is calculated based on the arithmetic mean of age at death in single years. Infants (less than 1 year old) are treated as age 0 years. Prior to 1964, age at death in years is estimated using the midpoint of the 5 year age group. For example, all persons age 0 to 4 are treated as age 2.5 years. Prior to 1964, mean age at death is calculat…
	Median age at death: For years 1964 onward, median age at death is calculated based on the median of age at death in single years. Infants (less than 1 year old) are treated as age 0 years. Median age at death is not calculated for years prior to 1964.
	% ICD chapter: represents the per cent of all deaths (by sex) in the parent ICD-10 chapter that are due to this particular cause.
	% All causes: represents the per cent of the total deaths in that year (by sex) that are due to this particular cause.
	Potential years of life lost (PYLL): PYLL is an indicator of premature mortality. It represents the total number of years not lived by an individual before an arbitrary upper limit to life, in this workbook age 75 years. For years 1964 onward, PYLL is calculated based on age at death in single years. Prior to 1964, age at death in years is estimated using the midpoint of the 5 year age group. For…
	PYLL before age 75 (person-years): PYLL is presented here in person-years.
	PYLL before age 75 (rate): PYLL is presented here as a rate of person-years per 1,000 population under age 75 years.
	% Total PYLL before age 75: PYLL is presented here as a per cent of all PYLLs (by sex) in that year.
	M:F rate ratio: represents the age-standardised rate of death in males divided by the rate of death in females. A ratio of 1 means that males and females have the same rate; a ratio of greater than 1 means that the rate is higher for males as compared to females; a ratio of less than 1 means that the rate is lower for males as compared to females.
	Other notes
	Some of the summary measures in this workbook will be different to those in earlier versions due to different calculation methods. For example, this version uses single year of age at death directly from the source data to derive mean age at death for years 1964 onward, whereas the same measure in previous versions used the midpoint of the five-year age group as the mean for all deaths in the age…
	Where to get more information about deaths in Australia
	AIHW deaths webpage	http://www.aihw.gov.au/deaths/
	AIHW Australia's health	http://www.aihw.gov.au/australias-health-publications/
	AIHW data request tool	http://datarequest.aihw.gov.au

## Sheet: Graphs
	Motor neurone disease (ICD-10 G12.2), 1959–2013
	Graphs

## Sheet: Interactive summary tables
	Motor neurone disease (ICD-10 G12.2), 1959–2013
	Interactive summary tables
		Average annual and total change in mortality rates									Average annual and total change in mortality rates for Motor neurone disease (ICD-10 G12.2) in Australia, 1959–2013.
		1. Select the first year				2. Select the last year
		(Data available for 1959 to 2013)									Years	Males	Females	Persons
		1959				2013			Average annual change		1959 – 2013	0.0119535	0.0166942	0.0140241
									Total change		1959 – 2013	0.899631	1.445	1.12132
									Notes		Average annual change in mortality rates indicates the extent of change in age-standardised rates over time. The rates are expressed as a per cent change per year. A negative number indicates a decrease. Care should be taken when interpreting total change in mortality rates, as one or both selected years may have had an unusually high or low number of deaths.
											.. Not applicable (for example, there were no deaths in one of the years selected)
		Aggregated age-specific mortality rates									Age-specific mortality rates (per 100,000 population) for Motor neurone disease (ICD-10 G12.2) in Australia, 1959–2013, 0–4 to 85+ years.
		1. Select the first and last years				2. Select age groups
		(Data available for 1959 to 2013)				Youngest		Oldest			Year(s)	Males	Females	Persons
		1959		2013		0–4		85+			1959 – 2013	2.11906	1.62577	1.87203
									Notes		Provides an age-specific mortality rate (per 100,000 population) for selected range of years and age groups.
											.. Not applicable

## Sheet: Summary measures
	Motor neurone disease (ICD-10 G12.2), 1959–2013
	Summary measures
	Males																Females																Persons
				Age-standardised rates (per 100,000)									Potential years of life lost (PYLL)							Age-standardised rates (per 100,000)									Potential years of life lost (PYLL)							Age-standardised rates (per 100,000)									Potential years of life lost (PYLL)
	Year	Total deaths	Crude rate (per 100,000)	Australian standard (2001)	Adjusted by comparability factor	OECD standard (2010)	WHO world standard	Segi world standard	Mean age at death (years)	Median age at death (years)	% ICD chapter	% All causes	PYLL before age 75 (person-years)	PYLL before age 75 (rate)	% Total PYLL before age 75		Year	Total deaths	Crude rate (per 100,000)	Australian standard (2001)	Adjusted by comparability factor	OECD standard (2010)	WHO world standard	Segi world standard	Mean age at death (years)	Median age at death (years)	% ICD chapter	% All causes	PYLL before age 75 (person-years)	PYLL before age 75 (rate)	% Total PYLL before age 75		Year	Total deaths	Crude rate (per 100,000)	Australian standard (2001)	Adjusted by comparability factor	OECD standard (2010)	WHO world standard	Segi world standard	Mean age at death (years)	Median age at death (years)	% ICD chapter	% All causes	PYLL before age 75 (person-years)	PYLL before age 75 (rate)	% Total PYLL before age 75	M:F rate ratio
	1900																1900																1900
	1901																1901																1901
	1902																1902																1902
	1903																1903																1903
	1904																1904																1904
	1905																1905																1905
	1906																1906																1906
	1907																1907																1907
	1908																1908																1908
	1909																1909																1909
	1910																1910																1910
	1911																1911																1911
	1912																1912																1912
	1913																1913																1913
	1914																1914																1914
	1915																1915																1915
	1916																1916																1916
	1917																1917																1917
	1918																1918																1918
	1919																1919																1919
	1920																1920																1920
	1921																1921																1921
	1922																1922																1922
	1923																1923																1923
	1924																1924																1924
	1925																1925																1925
	1926																1926																1926
	1927																1927																1927
	1928																1928																1928
	1929																1929																1929
	1930																1930																1930
	1931																1931																1931
	1932																1932																1932
	1933																1933																1933
	1934																1934																1934
	1935																1935																1935
	1936																1936																1936
	1937																1937																1937
	1938																1938																1938
	1939																1939																1939
	1940																1940																1940
	1941																1941																1941
	1942																1942																1942
	1943																1943																1943
	1944																1944																1944
	1945																1945																1945
	1946																1946																1946
	1947																1947																1947
	1948																1948																1948
	1949																1949																1949
	1950																1950																1950
	1951																1951																1951
	1952																1952																1952
	1953																1953																1953
	1954																1954																1954
	1955																1955																1955
	1956																1956																1956
	1957																1957																1957
	1958																1958																1958
	1959	63	1.24011	1.70697		1.91894	1.31904	1.19756	59.5635		—	0.125266	1015	0.204201	0.130304		1959	40	0.803826	0.945607		1.02448	0.730019	0.660883	61.75		—	0.102778	542.5	0.11269	0.114032		1959	103	1.02422	1.29251		1.42925	1.00509	0.916096	60.4126		—	0.115455	1557.5	0.159177	0.124134	1.80516
	1960	70	1.34815	1.81139		2.04441	1.40811	1.33636	57.4286		—	0.141047	1267.5	0.249572	0.167194		1960	38	0.747634	0.874245		0.981265	0.681268	0.614453	63.1579		—	0.0978499	470	0.0956626	0.0991164		1960	108	1.05109	1.30609		1.4647	1.02476	0.957793	59.4444		—	0.122084	1737.5	0.173893	0.140997	2.07194
	1961	54	1.01651	1.31493		1.46026	1.05886	0.958665	57.4074		—	0.107467	970	0.186747	0.126038		1961	30	0.577378	0.683153		0.781334	0.519516	0.468557	65.5		—	0.0774933	310	0.0617678	0.0674342		1961	84	0.799376	0.994984		1.11517	0.788426	0.713332	60.2976		—	0.0944234	1280	0.125331	0.104123	1.9248
	1962	56	1.03719	1.37012		1.55632	1.07919	1.04387	54.8214		—	0.106915	1162.5	0.220279	0.146859		1962	42	0.792258	0.878302		0.982632	0.720193	0.692015	55.8333		—	0.102979	827.5	0.161738	0.175018		1962	98	0.915845	1.10053		1.23858	0.888468	0.857965	55.2551		—	0.105192	1990	0.191462	0.157389	1.55996
	1963	51	0.92729	1.22291		1.35332	0.955544	0.878189	57.2059		—	0.095843	935	0.173966	0.11841		1963	35	0.647309	0.76639		0.883263	0.586481	0.56115	60.3571		—	0.0839691	555	0.106458	0.115876		1963	86	0.788492	0.983099		1.10661	0.762778	0.712893	58.4884		—	0.0906274	1490	0.140727	0.117453	1.59567
	1964	73	1.30236	1.65668		1.84671	1.32949	1.26407	54.2055	61	—	0.129787	1545	0.282145	0.185245		1964	46	0.833877	0.972106		1.10366	0.777144	0.75099	58.3913	61.5	—	0.103725	799	0.150332	0.159956		1964	119	1.06999	1.291		1.45033	1.03793	0.99683	55.8235	61	—	0.118297	2344	0.217222	0.175772	1.70422
	1965	64	1.11996	1.50672		1.70054	1.17865	1.12929	56.3281	63	—	0.114757	1225	0.219459	0.148097		1965	45	0.799801	0.895441		1.01097	0.710345	0.674558	59.8667	66	—	0.102401	708	0.130692	0.144254		1965	109	0.961123	1.16595		1.31365	0.924348	0.884854	57.789	64	—	0.109312	1933	0.17574	0.146666	1.68265
	1966	67	1.14695	1.57486		1.76385	1.19582	1.10599	59.4925	62	—	0.115927	1062	0.186123	0.126482		1966	29	0.503655	0.571754		0.638212	0.453115	0.432267	58.5862	63	—	0.0628604	489	0.0882574	0.0989564		1966	96	0.827622	1.0221		1.14145	0.794546	0.744716	59.2188	62.5	—	0.0923708	1551	0.137909	0.116284	2.75443
	1967	58	0.976543	1.24886		1.37908	1.00858	0.942895	55.7414	59	—	0.100856	1130	0.19477	0.132435		1967	50	0.853278	0.951449		1.05772	0.786978	0.770103	56.86	61.5	—	0.110632	911	0.161658	0.183609		1967	108	0.915326	1.0862		1.2021	0.890166	0.851136	56.2593	60	—	0.105158	2041	0.178455	0.151251	1.31259
	1968	77	1.27415	1.79488		2.05139	1.36255	1.23635	62.0519	65	12.1069	0.126103	1053	0.178342	0.119227		1968	53	0.888457	1.04079		1.19419	0.817458	0.760958	62.0566	62	9.48122	0.10931	733	0.127822	0.143077		1968	130	1.08255	1.36496		1.55998	1.05718	0.972137	62.0538	63	10.8787	0.11867	1786	0.153451	0.127983	1.72453
	1969	67	1.08587	1.57305		1.82219	1.16786	1.05694	63.9701	63	11.453	0.112254	788	0.130646	0.0880547		1969	49	0.804225	0.961203		1.08656	0.75161	0.706911	62.2245	63	9.70297	0.104678	659	0.112514	0.128537		1969	116	0.945934	1.219		1.39794	0.931377	0.862467	63.2328	63	10.6422	0.108924	1447	0.121713	0.1028	1.63654
	1970	57	0.905916	1.29864		1.46224	0.968704	0.861583	61.7193	63	9.59596	0.0907239	793	0.128885	0.084837		1970	42	0.675744	0.816356		0.916446	0.60416	0.537836	65.5476	67	8.41683	0.083632	431	0.0721414	0.0806379		1970	99	0.791535	1.03299		1.16092	0.772755	0.690745	63.3434	64	9.05764	0.0875734	1224	0.100931	0.0833094	1.59077
	1971	76	1.15714	1.60056		1.79696	1.22378	1.11539	61.7237	63	12.5	0.124439	1037	0.161395	0.112134		1971	50	0.76931	0.895672		1.03001	0.697447	0.659942	63.8	64.5	9.80392	0.100855	592	0.0947249	0.10858		1971	126	0.964242	1.21255		1.37495	0.939147	0.871642	62.5476	63.5	11.2701	0.113873	1629	0.128522	0.110816	1.787
	1972	66	0.987262	1.41138		1.58795	1.06071	0.972634	62.2121	64.5	11.6402	0.107991	865	0.132234	0.0955318		1972	55	0.831003	0.986256		1.13285	0.749649	0.680255	64.0545	63	10.8911	0.113066	651	0.10232	0.125956		1972	121	0.909524	1.17471		1.33451	0.889537	0.81256	63.0496	63	11.2873	0.110241	1516	0.117485	0.106588	1.43105
	1973	84	1.23842	1.89998		2.17029	1.36349	1.20095	63.4524	65	13.6364	0.13639	1065	0.160442	0.11829		1973	59	0.877755	1.03064		1.1875	0.78493	0.731139	65.4407	67	11.39	0.119836	627	0.0970647	0.124495		1973	143	1.0589	1.38812		1.58628	1.03298	0.937241	64.2727	66	12.6102	0.129036	1692	0.129185	0.120516	1.8435
	1974	79	1.14664	1.54963		1.78559	1.19808	1.11008	61.3291	62	12.5198	0.122864	1125	0.166845	0.121806		1974	57	0.834199	0.938785		1.0592	0.762976	0.728439	60.807	62	10.536	0.110607	817	0.12445	0.160414		1974	136	0.991068	1.19629		1.36456	0.953629	0.900023	61.1103	62	11.6041	0.11741	1942	0.145931	0.135529	1.65067
	1975	105	1.50663	2.06863		2.36687	1.57751	1.4324	62.0857	63	16.881	0.172874	1413	0.207262	0.162356		1975	76	1.09766	1.27		1.44029	0.989451	0.929947	63.1711	63.5	13.945	0.157405	954	0.143557	0.202932		1975	181	1.30281	1.61722		1.8421	1.25223	1.1609	62.5414	63	15.5099	0.166023	2367	0.175817	0.176587	1.62884
	1976	97	1.3794	1.98214		2.25	1.47172	1.32181	60.2474	62	15.798	0.155133	1513	0.220093	0.178319		1976	54	0.771313	0.889498		1.0013	0.666562	0.61465	65.8333	69	10.3846	0.107709	520	0.0774908	0.112356		1976	151	1.07603	1.36051		1.53015	1.03178	0.942257	62.245	64	13.3157	0.134029	2033	0.149652	0.155038	2.22838
	1977	95	1.33714	1.80565		2.03203	1.37132	1.23602	61.4421	63	14.526	0.157493	1343	0.19342	0.161054		1977	62	0.874776	1.00759		1.14185	0.753136	0.67682	64.0968	64.5	12.9979	0.127914	733	0.107931	0.163438		1977	157	1.10624	1.37426		1.54877	1.042	0.940283	62.4904	63	13.8815	0.144315	2076	0.151149	0.161888	1.79206
	1978	74	1.03046	1.39962		1.5893	1.06406	0.979926	60.9189	64	14.0684	0.122758	1087	0.154957	0.133594		1978	78	1.08666	1.18487		1.36583	0.928786	0.88389	63.3205	65	14.5522	0.162014	975	0.141821	0.224139		1978	152	1.05855	1.27509		1.45856	0.987166	0.92906	62.1513	64.5	14.3126	0.140189	2062	0.148455	0.165138	1.18124
	1979	107	1.4751	2.01627	2.27839	2.32092	1.48685	1.34293	64.9346	65	14.965	0.180569	1142	0.16126	0.145535		1979	71	0.977696	1.09719	1.23982	1.27045	0.83065	0.767627	65.6197	64	12.8159	0.150071	720	0.103582	0.172955		1979	178	1.22626	1.49424	1.68849	1.72138	1.12132	1.0271	65.2079	65	14.0268	0.167029	1862	0.13269	0.15504	1.83767
	1980	127	1.7307	2.40417	2.71671	2.72047	1.73418	1.54282	65.3701	67	18.787	0.209855	1313	0.1834	0.168624		1980	88	1.19609	1.31547	1.48648	1.50059	1.00333	0.928917	65.1477	67	14.4737	0.18266	935	0.132877	0.230854		1980	215	1.46305	1.7801	2.01151	2.01759	1.3227	1.20264	65.2791	67	16.7445	0.197801	2248	0.158357	0.189917	1.82761
	1981	108	1.45	1.95331	2.20724	2.22326	1.44583	1.27699	63.2407	64	14.7139	0.177936	1340	0.184516	0.17593		1981	92	1.23077	1.36798	1.54582	1.59425	0.984495	0.889475	68.6413	68	15.3589	0.190449	751	0.105128	0.190327		1981	200	1.34019	1.64824	1.86251	1.89788	1.20671	1.07924	65.725	66	15.0038	0.183481	2091	0.145149	0.180843	1.42788
	1982	116	1.53016	2.0711	2.34034	2.37981	1.52333	1.38658	63.8793	65.5	14.0266	0.183269	1389	0.188039	0.177051		1982	114	1.49934	1.63522	1.84779	1.9036	1.2034	1.09802	67.807	68	17.1946	0.221462	974	0.134167	0.237915		1982	230	1.51473	1.82158	2.05838	2.10076	1.34924	1.22954	65.8261	67	15.4362	0.200399	2363	0.161337	0.197921	1.26656
	1983	121	1.57422	2.07517	2.34494	2.38352	1.53857	1.40795	63.6942	65	15.0124	0.200165	1457	0.194679	0.198203		1983	101	1.31048	1.40508	1.58774	1.63359	1.03528	0.927511	68.3267	68	14.5324	0.203489	818	0.111298	0.205653		1983	222	1.44217	1.70749	1.92947	1.96811	1.26992	1.15341	65.8018	66	14.7901	0.201664	2275	0.153367	0.200819	1.47691
	1984	117	1.5042	1.98631	2.24453	2.25748	1.47247	1.33662	63.2991	65	14.2509	0.195042	1462	0.193224	0.207059		1984	94	1.20495	1.33875	1.51278	1.51481	0.966665	0.851403	67.5638	69	13.6232	0.188275	840	0.113073	0.220253		1984	211	1.35435	1.63233	1.84453	1.84831	1.20299	1.08044	65.1991	67	13.9643	0.191968	2302	0.153516	0.211686	1.48371
	1985	154	1.95364	2.53197	2.86112	2.95338	1.88072	1.70587	64.0714	63.5	15.7143	0.24004	1859	0.242671	0.247473		1985	116	1.46732	1.56357	1.76683	1.8064	1.11989	0.992464	68.8103	70	13.2875	0.212252	908	0.120787	0.22294		1985	270	1.71013	2.00135	2.26153	2.31834	1.47719	1.33151	66.1074	66	14.571	0.227257	2767	0.182304	0.238848	1.61935
	1986	119	1.48747	1.99341	2.25255	2.30254	1.41032	1.23983	65.8824	68	13.0626	0.191288	1247	0.160563	0.17232		1986	119	1.48413	1.55362	1.75559	1.77534	1.09872	0.962476	69.5378	71	13.6625	0.225503	837	0.109941	0.214553		1986	238	1.4858	1.73659	1.96234	1.98925	1.23812	1.08926	67.7101	69.5	13.3558	0.206991	2084	0.135504	0.187113	1.28307
	1987	136	1.67524	2.19262	2.47766	2.50774	1.55859	1.37465	66.3676	68	13.5055	0.213806	1316	0.167133	0.182686		1987	134	1.64506	1.71404	1.93687	1.97003	1.27402	1.16032	67.2836	67.5	13.8573	0.249488	1195	0.154677	0.315163		1987	270	1.66012	1.90306	2.15046	2.17662	1.39053	1.24858	66.8222	68	13.6778	0.230142	2511	0.160964	0.228371	1.27921
	1988	178	2.15785	2.86755	3.24033	3.31734	2.00438	1.7297	67.2416	68	16.036	0.27351	1650	0.206402	0.222991		1988	110	1.32799	1.4047	1.58731	1.60909	1.02764	0.926068	66.5909	69	10.5871	0.200789	1136	0.144741	0.290082		1988	288	1.74206	2.0284	2.2921	2.33313	1.45634	1.28598	66.9931	69	13.4016	0.240272	2786	0.175855	0.24621	2.04139
	1989	172	2.05065	2.71054	3.06291	3.09704	1.91426	1.68216	65.8314	68	14.3573	0.257	1798	0.221408	0.24942		1989	148	1.7563	1.85484	2.09597	2.12145	1.33761	1.20118	68.9122	70	12.5106	0.258263	1147	0.143824	0.29806		1989	320	1.90313	2.21373	2.50152	2.52224	1.5913	1.41653	67.2562	69	13.4397	0.257583	2945	0.182967	0.266349	1.46134
	1990	183	2.15009	2.69786	3.04858	3.11118	1.93709	1.71991	66.6503	67	16.7276	0.283028	1758	0.213495	0.24635		1990	121	1.41457	1.48645	1.67969	1.68154	1.06628	0.930093	67.5868	70	10.3863	0.218404	1107	0.136866	0.2932		1990	304	1.78141	2.02105	2.28378	2.30893	1.46102	1.2943	67.023	68	13.4573	0.253207	2865	0.175523	0.26256	1.81496
	1991	150	1.74107	2.27885	2.5751	2.65582	1.56223	1.35255	67.7133	68.5	13.2042	0.23413	1365	0.163909	0.201367		1991	132	1.52273	1.55167	1.75339	1.79205	1.12761	1.01547	68.6515	69	10.9272	0.239656	1041	0.127142	0.283558		1991	282	1.63156	1.83543	2.07403	2.12418	1.30494	1.15669	68.1525	69	12.0307	0.236684	2406	0.145682	0.230242	1.46864
	1992	176	2.02107	2.58495	2.921	3.00289	1.80905	1.57532	67.0682	68	13.7608	0.266203	1671	0.198676	0.247282		1992	149	1.6989	1.72127	1.94504	2.01116	1.19092	1.03071	71.2349	72	10.8364	0.258928	928	0.112149	0.254394		1992	325	1.85941	2.10489	2.37853	2.4472	1.47553	1.28681	68.9785	70	12.2457	0.262817	2599	0.155765	0.249776	1.50177
	1993	191	2.17491	2.66152	3.00752	3.08773	1.86924	1.62424	67.9058	69	13.6918	0.293444	1634	0.192789	0.250258		1993	144	1.6266	1.63828	1.85126	1.87806	1.16109	1.01695	70.0347	71.5	10.33	0.254822	945	0.11326	0.270888		1993	335	1.89965	2.07654	2.34649	2.38986	1.47559	1.29258	68.8209	70	12.0115	0.275496	2579	0.153336	0.257442	1.62458
	1994	204	2.30153	2.82446	3.19164	3.22582	1.97165	1.70399	66.8725	70	14.7186	0.302384	1986	0.232299	0.306846		1994	151	1.6887	1.67907	1.89735	1.93744	1.17163	1.01971	70.5695	73	9.76714	0.254947	1047	0.124335	0.302784		1994	355	1.99377	2.18132	2.46489	2.49728	1.53329	1.33349	68.4451	71	12.1078	0.280207	3033	0.178726	0.305431	1.68215
	1995	209	2.33248	2.79356	3.15672	3.19385	1.98248	1.71839	66.5502	68	15.036	0.315467	2072	0.240017	0.322665		1995	163	1.80221	1.78352	2.01538	2.07729	1.2617	1.11959	70.2699	71	10.3558	0.276825	1166	0.137074	0.334562		1995	372	2.06611	2.24188	2.53333	2.58077	1.5957	1.40273	68.1801	70	12.5506	0.297284	3238	0.188925	0.326851	1.56632
	1996	211	2.32755	2.82153	3.18833	3.2886	1.97458	1.72808	67.3507	68	13.8725	0.309357	2038	0.233681	0.315477		1996	130	1.4193	1.38845	1.56895	1.5955	0.979663	0.868062	70.0462	70	8.3871	0.21483	908	0.105579	0.266136		1996	341	1.87108	2.00537	2.26607	2.31437	1.42703	1.26251	68.3783	70	11.1039	0.264918	2946	0.170078	0.298424	2.03215
	1997	175	1.91128	2.23927	2.23927	2.56963	1.58081	1.38237	66.7029	69	10.6903	0.258295	1724	0.196012	0.271459		1997	192	2.0719	2.00975	2.00975	2.29894	1.43595	1.27438	69.4219	71	9.27985	0.311698	1426	0.164207	0.409141		1997	367	1.99207	2.10124	2.10124	2.40405	1.49749	1.32224	68.1253	70	9.90286	0.283726	3150	0.18021	0.320245	1.1142
	1998	231	2.49915	2.96928	2.96928	3.45703	2.02578	1.73699	68.632	71	13.3141	0.344401	1973	0.222548	0.314701		1998	200	2.13574	2.03047	2.03047	2.34016	1.38723	1.19484	71.63	74	10.0908	0.332618	1185	0.135272	0.351065		1998	431	2.31626	2.43088	2.43088	2.81028	1.67242	1.44214	70.0232	72	11.5954	0.338831	3158	0.17917	0.327427	1.46236
	1999	251	2.68733	3.05409	3.05409	3.53989	2.1332	1.88363	68.3267	70	13.8064	0.373362	2123	0.237343	0.340285		1999	184	1.94254	1.83732	1.83732	2.08849	1.29122	1.12317	69.9946	72	8.88031	0.302259	1295	0.146397	0.384929		1999	435	2.31232	2.36865	2.36865	2.71554	1.6743	1.47487	69.0322	71	11.1825	0.339573	3418	0.192123	0.355925	1.66226
	2000	253	2.6791	3.08006	3.08006	3.59699	2.09716	1.78466	68.9368	72	13.7575	0.378646	2179	0.241306	0.364969		2000	204	2.12825	1.96718	1.96718	2.29048	1.33991	1.14916	72.4657	74	9.27273	0.331848	1118	0.125105	0.335944		2000	457	2.40162	2.44152	2.44152	2.83879	1.67745	1.43854	70.512	73	11.3147	0.356221	3297	0.183508	0.354581	1.56572
	2001	280	2.92831	3.28336	3.28336	3.82214	2.24014	1.93048	68.7857	71	14.7835	0.418942	2388	0.261634	0.41092		2001	191	1.96646	1.81521	1.81521	2.10041	1.27737	1.1334	70.7173	73	8.2684	0.309517	1369	0.151432	0.425318		2001	471	2.44362	2.44262	2.44262	2.82641	1.70595	1.4929	69.569	72	11.2036	0.366412	3757	0.206797	0.416052	1.80881
	2002	294	3.03861	3.28477	3.28477	3.81936	2.28447	2.00608	69.5204	70	13.7063	0.426798	2231	0.241874	0.391386		2002	207	2.108	1.93824	1.93824	2.24044	1.37629	1.215	70.2754	72	8.35688	0.319336	1517	0.16615	0.462248		2002	501	2.56986	2.53741	2.53741	2.9383	1.79237	1.58278	69.8323	71	10.8395	0.3747	3748	0.204205	0.417277	1.69472
	2003	275	2.80968	2.9634	2.9634	3.35244	2.09091	1.81635	67.4364	70	14.3528	0.402459	2498	0.268058	0.441708		2003	255	2.56716	2.33101	2.33101	2.67657	1.6333	1.42048	70.4196	72	10.5897	0.398674	1823	0.197565	0.567243		2003	530	2.68753	2.63423	2.63423	3.00078	1.85409	1.61259	68.8717	71	12.2572	0.400629	4321	0.232985	0.487197	1.27129
	2004	273	2.7587	2.92641	2.92641	3.35606	2.03088	1.761	68.0952	70	13.3431	0.399152	2428	0.257997	0.441074		2004	234	2.33143	2.12552	2.12552	2.42632	1.47803	1.28981	70.6282	72	9.30418	0.364981	1583	0.169917	0.503973		2004	507	2.54356	2.47743	2.47743	2.82858	1.73019	1.50793	69.2643	71	11.116	0.382618	4011	0.21418	0.463926	1.37679
	2005	273	2.72465	2.86133	2.86133	3.32775	1.94218	1.66001	69.6557	72	13.0435	0.406002	2161	0.227053	0.391738		2005	226	2.22502	1.97377	1.97377	2.29689	1.38772	1.21325	70.9823	72	8.67896	0.356057	1586	0.168341	0.504923		2005	499	2.47313	2.35285	2.35285	2.73034	1.63274	1.41301	70.2565	72	10.6238	0.38175	3747	0.197846	0.432803	1.44968
	2006	294	2.89386	2.97558	2.97558	3.43253	2.06073	1.78472	69.0714	70	13.3515	0.428847	2401	0.249021	0.443002		2006	239	2.3223	2.07664	2.07664	2.38236	1.43049	1.22567	71.41	73	8.76742	0.36666	1473	0.154364	0.471218		2006	533	2.60623	2.48146	2.48146	2.85036	1.72294	1.48844	70.1201	72	10.8157	0.398537	3874	0.201937	0.453323	1.43288
	2007	341	3.29353	3.3456	3.3456	3.86287	2.34391	2.04495	68.4194	69	13.5371	0.483215	3018	0.307296	0.55108		2007	254	2.42506	2.12552	2.12552	2.457	1.4607	1.26284	71.6968	73	8.56372	0.377499	1597	0.164457	0.495123		2007	595	2.85678	2.6852	2.6852	3.09576	1.87639	1.63512	69.8185	71	10.8478	0.431616	4615	0.23628	0.530339	1.57402
	2008	343	3.24441	3.24262	3.24262	3.74154	2.28113	1.99616	68.379	69	12.5182	0.466362	2951	0.294302	0.527999		2008	268	2.51003	2.20652	2.20652	2.54129	1.54476	1.34916	71.0933	72	8.26395	0.380693	1821	0.183903	0.568711		2008	611	2.8754	2.68702	2.68702	3.09471	1.89318	1.65899	69.5696	71	10.2123	0.424465	4772	0.239449	0.542827	1.46956
	2009	366	3.38864	3.34631	3.34631	3.85015	2.38496	2.08348	67.776	68.5	13.2273	0.506084	3330	0.325091	0.592195		2009	233	2.13941	1.86316	1.86316	2.15385	1.27745	1.11161	72.3691	73	7.41566	0.340444	1353	0.133908	0.413035		2009	599	2.76143	2.56844	2.56844	2.95798	1.81098	1.58432	69.5626	71	10.1371	0.425547	4683	0.230154	0.526245	1.79604
	2010	366	3.33703	3.30636	3.30636	3.80527	2.30502	2.01087	68.6721	70	13.1371	0.498068	3137	0.301746	0.560287		2010	282	2.54883	2.2336	2.2336	2.56865	1.57698	1.38487	70.3475	71	8.23117	0.402921	2006	0.195474	0.62612		2010	648	2.94121	2.71424	2.71424	3.11598	1.91325	1.67713	69.4012	71	10.4314	0.451653	5143	0.248955	0.584247	1.48028
	2011	391	3.51675	3.4333	3.4333	3.96005	2.38379	2.08442	68.9642	70	12.8365	0.51905	3310	0.314335	0.608794		2011	286	2.54861	2.14118	2.14118	2.48968	1.47073	1.26994	71.9056	73.5	7.73391	0.39943	1821	0.175031	0.556925		2011	677	3.03044	2.73978	2.73978	3.16469	1.90316	1.65879	70.2068	71	10.0386	0.460757	5131	0.245103	0.589315	1.60346
	2012	390	3.44742	3.2965	3.2965	3.84519	2.25782	1.95797	70.4	71	12.8628	0.521432	2857	0.26686	0.540236		2012	288	2.5229	2.1327	2.1327	2.47225	1.47015	1.26502	71.8472	72	7.45535	0.398318	1776	0.167811	0.555837		2012	678	2.98307	2.65813	2.65813	3.08634	1.83577	1.59002	71.0147	72	9.83321	0.460917	4633	0.217621	0.546112	1.5457
	2013	389	3.37922	3.24262	3.24262	3.72995	2.23463	1.91584	69.5501	72	11.5396	0.513315	3066	0.281686	0.572653		2013	322	2.77244	2.31201	2.31201	2.68892	1.6038	1.38676	71.6118	72	7.77402	0.447869	1995	0.185289	0.612681		2013	711	3.07448	2.74183	2.74183	3.16526	1.90084	1.63833	70.4838	72	9.4636	0.481453	5061	0.233749	0.58779	1.40251
	2014																2014																2014
	2015																2015																2015
	2016																2016																2016
	2017																2017																2017
	2018																2018																2018
	2019																2019																2019
	2020																2020																2020
	2021																2021																2021
	2022																2022																2022
	2023																2023																2023
	2024																2024																2024
	2025																2025																2025
[truncated: 1 more columns]

## Sheet: Deaths
	Motor neurone disease (ICD-10 G12.2), 1959–2013
	Deaths
	Males																						Females																						Persons
		Age group (years)																						Age group (years)																						Age group (years)
	Year	0–4	5–9	10–14	15–19	20–24	25–29	30–34	35–39	40–44	45–49	50–54	55–59	60–64	65–69	70–74	75–79	80–84	85+	Missing	Total		Year	0–4	5–9	10–14	15–19	20–24	25–29	30–34	35–39	40–44	45–49	50–54	55–59	60–64	65–69	70–74	75–79	80–84	85+	Missing	Total		Year	0–4	5–9	10–14	15–19
	1900																						1900																						1900
	1901																						1901																						1901
	1902																						1902																						1902
	1903																						1903																						1903
	1904																						1904																						1904
	1905																						1905																						1905
	1906																						1906																						1906
	1907																						1907																						1907
	1908																						1908																						1908
	1909																						1909																						1909
	1910																						1910																						1910
	1911																						1911																						1911
	1912																						1912																						1912
	1913																						1913																						1913
	1914																						1914																						1914
	1915																						1915																						1915
	1916																						1916																						1916
	1917																						1917																						1917
	1918																						1918																						1918
	1919																						1919																						1919
	1920																						1920																						1920
	1921																						1921																						1921
	1922																						1922																						1922
	1923																						1923																						1923
	1924																						1924																						1924
	1925																						1925																						1925
	1926																						1926																						1926
	1927																						1927																						1927
	1928																						1928																						1928
	1929																						1929																						1929
	1930																						1930																						1930
	1931																						1931																						1931
	1932																						1932																						1932
	1933																						1933																						1933
	1934																						1934																						1934
	1935																						1935																						1935
	1936																						1936																						1936
	1937																						1937																						1937
	1938																						1938																						1938
	1939																						1939																						1939
	1940																						1940																						1940
	1941																						1941																						1941
	1942																						1942																						1942
	1943																						1943																						1943
	1944																						1944																						1944
	1945																						1945																						1945
	1946																						1946																						1946
	1947																						1947																						1947
	1948																						1948																						1948
	1949																						1949																						1949
	1950																						1950																						1950
	1951																						1951																						1951
	1952																						1952																						1952
	1953																						1953																						1953
	1954																						1954																						1954
	1955																						1955																						1955
	1956																						1956																						1956
	1957																						1957																						1957
	1958																						1958																						1958
	1959	0	0	0	2	2	0	1	0	2	6	9	6	11	8	7	5	4	0	0	63		1959	0	0	0	0	0	0	0	2	4	1	5	5	3	7	8	5	0	0	0	40		1959	0	0	0	2
	1960	3	0	0	2	0	0	1	3	2	5	10	6	12	9	12	2	1	2	0	70		1960	0	0	0	0	0	0	0	2	1	1	3	8	4	9	4	5	1	0	0	38		1960	3	0	0	2
	1961	0	0	0	2	1	0	2	2	3	2	5	14	6	5	8	2	2	0	0	54		1961	0	0	0	0	0	0	0	0	1	1	2	5	4	8	3	4	2	0	0	30		1961	0	0	0	2
	1962	5	0	1	1	0	1	0	0	2	1	9	8	12	4	7	3	0	2	0	56		1962	4	0	1	0	0	0	0	1	2	2	3	6	7	6	5	3	2	0	0	42		1962	9	0	2	1
	1963	2	0	1	1	0	0	0	1	7	2	4	6	7	7	6	5	2	0	0	51		1963	3	0	0	0	0	0	0	0	0	1	6	1	10	3	4	3	3	1	0	35		1963	5	0	1	1
	1964	8	0	0	0	1	0	1	1	5	2	7	9	13	9	8	7	2	0	0	73		1964	2	0	1	0	0	1	0	0	2	3	5	5	10	7	4	4	0	2	0	46		1964	10	0	1	0
	1965	5	0	1	1	0	1	0	2	2	3	5	5	10	10	14	2	2	1	0	64		1965	2	1	1	0	0	0	0	0	0	0	7	5	5	11	8	2	3	0	0	45		1965	7	1	2	1
	1966	3	0	0	1	0	0	0	0	4	1	9	12	10	6	13	6	1	1	0	67		1966	2	0	0	0	0	0	0	0	2	1	3	3	5	4	5	3	1	0	0	29		1966	5	0	0	1
	1967	2	1	0	1	0	0	1	3	3	5	4	10	8	8	7	4	1	0	0	58		1967	4	0	0	0	0	0	1	0	0	3	8	6	8	10	6	4	0	0	0	50		1967	6	1	0	1
	1968	0	0	0	3	0	0	1	1	1	3	7	13	9	19	9	6	4	1	0	77		1968	0	0	0	1	0	0	0	2	0	5	3	8	13	8	3	7	2	1	0	53		1968	0	0	0	4
	1969	0	0	0	0	0	0	0	1	1	3	5	11	15	12	8	6	4	1	0	67		1969	0	0	0	0	0	1	0	1	3	1	5	8	9	7	10	2	0	2	0	49		1969	0	0	0	0
	1970	0	0	1	0	0	1	0	1	3	6	1	9	12	4	8	8	3	0	0	57		1970	0	0	0	0	0	0	0	1	3	0	2	4	7	7	7	9	2	0	0	42		1970	0	0	1	0
	1971	0	0	0	1	1	0	0	0	2	5	9	13	12	13	10	8	2	0	0	76		1971	0	0	0	0	0	0	0	0	0	6	4	4	11	11	8	2	4	0	0	50		1971	0	0	0	1
	1972	0	1	0	0	1	0	0	2	1	3	5	9	11	11	14	7	0	1	0	66		1972	0	0	0	0	1	0	0	0	0	1	6	13	10	7	6	7	2	2	0	55		1972	0	1	0	0
	1973	0	1	0	0	1	0	0	1	3	5	8	13	8	15	13	8	5	3	0	84		1973	0	0	0	0	0	0	0	1	0	2	7	6	9	16	10	2	4	2	0	59		1973	0	1	0	0
	1974	1	0	0	1	0	0	0	1	3	3	5	16	21	9	11	4	3	1	0	79		1974	0	0	0	0	1	0	0	2	0	3	8	8	13	10	10	1	1	0	0	57		1974	1	0	0	1
	1975	0	0	0	0	1	1	0	3	5	5	7	13	27	15	14	7	7	0	0	105		1975	0	0	0	0	0	1	0	1	2	7	5	9	14	15	13	5	2	2	0	76		1975	0	0	0	0
	1976	0	0	1	2	0	0	2	3	6	7	8	12	18	12	9	10	3	4	0	97		1976	0	0	0	0	0	0	0	1	1	1	5	4	7	13	14	6	1	1	0	54		1976	0	0	1	2
	1977	0	0	0	2	1	0	2	2	3	6	6	12	19	12	16	10	4	0	0	95		1977	2	0	0	0	0	0	0	0	0	3	4	11	11	5	9	12	5	0	0	62		1977	2	0	0	2
	1978	3	0	0	0	0	0	0	2	3	5	5	6	17	10	12	6	5	0	0	74		1978	1	1	1	0	0	0	0	2	0	1	6	8	15	21	12	4	3	3	0	78		1978	4	1	1	0
	1979	0	0	0	1	0	0	0	0	3	5	4	14	19	23	21	10	6	1	0	107		1979	0	0	0	0	0	0	0	1	0	3	4	8	20	9	12	8	5	1	0	71		1979	0	0	0	1
	1980	0	0	0	0	0	0	1	0	4	5	12	12	16	27	25	18	5	2	0	127		1980	0	0	0	0	0	0	1	0	2	3	6	12	12	22	17	7	3	3	0	88		1980	0	0	0	0
	1981	0	0	0	0	1	1	1	2	2	6	7	19	16	17	15	13	7	1	0	108		1981	0	0	0	0	0	0	0	0	2	1	7	6	13	23	16	7	10	7	0	92		1981	0	0	0	0
	1982	0	0	0	1	0	1	0	3	3	8	4	16	16	27	17	13	2	5	0	116		1982	0	0	0	0	0	0	0	0	1	4	4	10	24	22	22	12	11	4	0	114		1982	0	0	0	1
	1983	1	0	0	0	0	1	0	1	5	6	6	14	25	21	21	12	5	3	0	121		1983	0	0	0	0	0	0	0	1	1	2	3	11	12	32	11	14	11	3	0	101		1983	1	0	0	0
	1984	0	1	0	0	0	0	1	1	5	9	9	12	20	21	17	13	5	3	0	117		1984	0	0	0	0	0	0	0	1	2	2	9	10	8	17	18	14	9	4	0	94		1984	0	1	0	0
	1985	0	0	0	0	0	0	0	5	3	8	8	26	32	30	15	12	9	6	0	154		1985	0	0	0	0	0	0	0	2	1	3	3	12	13	22	27	14	12	7	0	116		1985	0	0	0	0
	1986	0	0	0	0	0	2	1	2	4	1	7	15	19	18	21	16	7	6	0	119		1986	1	0	0	0	0	0	0	2	1	1	2	12	7	24	32	21	10	6	0	119		1986	1	0	0	0
	1987	0	0	0	0	0	0	1	2	5	2	10	13	19	26	25	21	7	5	0	136		1987	1	0	0	0	0	0	1	0	2	2	6	14	21	28	26	19	9	5	0	134		1987	1	0	0	0
	1988	0	0	0	0	0	0	0	2	6	6	9	19	29	27	27	28	19	6	0	178		1988	2	0	0	0	0	0	0	2	5	3	5	9	17	15	17	16	11	8	0	110		1988	2	0	0	0
	1989	0	0	0	1	0	1	2	2	4	9	15	14	21	26	34	22	13	8	0	172		1989	1	0	0	0	0	0	0	0	0	6	9	11	17	26	36	20	15	7	0	148		1989	1	0	0	1
	1990	0	0	0	0	0	0	3	2	3	7	12	12	24	48	28	23	15	6	0	183		1990	0	0	0	1	0	1	1	3	3	4	6	10	10	18	21	24	11	8	0	121		1990	0	0	0	1
	1991	0	0	0	0	0	0	1	2	5	7	7	6	27	24	20	26	16	9	0	150		1991	0	0	0	0	0	0	1	1	2	4	6	7	18	29	26	16	15	7	0	132		1991	0	0	0	0
	1992	0	0	0	1	0	1	2	2	1	8	11	13	32	25	23	30	18	9	0	176		1992	0	1	0	0	0	0	0	0	2	1	2	13	16	24	28	27	21	14	0	149		1992	0	1	0	1
	1993	0	0	0	0	0	1	0	5	3	5	6	16	18	44	41	21	24	7	0	191		1993	0	0	0	0	0	0	2	0	2	1	4	10	19	22	32	33	13	6	0	144		1993	0	0	0	0
	1994	1	0	1	0	1	3	3	3	6	8	7	14	19	29	46	34	19	10	0	204		1994	1	0	0	0	0	0	0	2	3	2	8	7	13	28	24	27	23	13	0	151		1994	2	0	1	0
	1995	0	0	0	0	0	1	4	4	6	7	16	13	24	39	31	34	23	7	0	209		1995	0	0	0	0	0	0	1	2	1	5	4	12	22	23	33	25	17	18	0	163		1995	0	0	0	0
	1996	0	0	0	0	2	0	0	5	4	9	14	23	20	35	39	19	23	18	0	211		1996	0	0	0	0	1	0	0	0	0	4	7	10	8	24	31	21	10	14	0	130		1996	0	0	0	0
	1997	0	0	0	0	0	1	1	1	7	6	17	13	21	26	29	26	18	9	0	175		1997	0	0	0	0	0	0	1	2	1	7	11	13	14	36	43	31	18	15	0	192		1997	0	0	0	0
	1998	0	0	0	0	1	1	0	3	5	8	13	22	29	23	40	40	26	20	0	231		1998	0	0	0	0	0	0	0	1	3	6	8	11	18	23	38	46	23	23	0	200		1998	0	0	0	0
	1999	0	0	0	0	0	0	1	3	2	11	15	23	31	38	49	42	15	21	0	251		1999	0	0	0	0	0	0	0	3	4	8	4	14	11	27	41	42	16	14	0	184		1999	0	0	0	0
	2000	1	0	0	0	1	0	2	5	8	8	9	23	28	30	35	44	34	25	0	253		2000	0	0	0	0	1	0	0	0	1	4	5	16	21	20	36	47	26	27	0	204		2000	1	0	0	0
	2001	0	0	0	0	0	1	2	5	4	8	19	26	28	38	41	50	26	32	0	280		2001	1	0	0	0	0	0	0	1	2	4	16	8	19	29	33	28	28	22	0	191		2001	1	0	0	0
	2002	0	0	0	1	0	0	0	0	4	10	13	26	39	47	50	56	26	22	0	294		2002	0	0	0	0	0	1	0	1	3	7	10	17	23	27	36	33	29	20	0	207		2002	0	0	0	1
	2003	0	0	0	0	0	0	3	1	10	7	29	21	22	42	51	51	27	11	0	275		2003	1	0	0	0	0	0	1	2	6	6	12	21	18	33	49	40	41	25	0	255		2003	1	0	0	0
	2004	0	0	0	0	0	0	1	5	9	12	18	24	25	32	55	39	32	21	0	273		2004	0	0	0	0	0	0	1	1	5	4	15	12	22	30	46	49	26	23	0	234		2004	0	0	0	0
	2005	0	0	0	0	0	1	0	2	4	11	16	25	33	29	37	51	38	26	0	273		2005	0	0	0	1	0	0	0	1	1	7	8	21	30	23	39	32	43	20	0	226		2005	0	0	0	1
	2006	0	0	0	0	0	0	0	2	3	15	18	31	27	41	52	45	38	22	0	294		2006	0	0	0	0	0	1	1	0	4	2	10	21	22	24	49	46	38	21	0	239		2006	0	0	0	0
	2007	0	0	0	0	1	0	1	6	10	10	23	25	38	58	49	47	44	29	0	341		2007	0	0	0	0	1	0	1	1	1	5	12	15	32	26	43	49	36	32	0	254		2007	0	0	0	0
	2008	0	0	0	1	0	0	1	5	2	13	24	27	52	47	53	52	43	23	0	343		2008	0	0	0	0	0	1	0	1	3	6	14	21	26	43	40	48	34	31	0	268		2008	0	0	0	1
	2009	1	0	0	0	0	0	1	5	7	13	20	42	48	54	56	50	50	19	0	366		2009	0	0	0	0	0	0	0	0	1	8	9	12	21	38	41	41	30	32	0	233		2009	1	0	0	0
	2010	0	0	0	0	0	2	0	6	8	16	22	25	49	54	49	62	37	36	0	366		2010	0	0	0	0	1	0	0	2	5	8	8	18	35	46	50	48	37	24	0	282		2010	0	0	0	0
	2011	0	0	0	0	1	0	3	3	11	19	21	20	48	59	67	51	45	43	0	391		2011	0	0	0	0	0	0	1	1	2	10	12	17	35	35	41	42	48	42	0	286		2011	0	0	0	0
	2012	0	0	0	0	0	0	0	2	9	10	14	30	49	67	57	60	45	47	0	390		2012	0	0	0	0	0	0	2	0	0	7	10	22	33	40	48	48	45	33	0	288		2012	0	0	0	0
	2013	2	0	0	0	0	1	0	3	7	16	16	36	41	50	61	71	51	34	0	389		2013	0	0	0	0	0	0	1	2	2	1	10	27	42	49	52	53	46	37	0	322		2013	2	0	0	0
	2014																						2014																						2014
	2015																						2015																						2015
	2016																						2016																						2016
	2017																						2017																						2017
	2018																						2018																						2018
	2019																						2019																						2019
	2020																						2020																						2020
	2021																						2021																						2021
	2022																						2022																						2022
	2023																						2023																						2023
	2024																						2024																						2024
	2025																						2025																						2025
[truncated: 17 more columns]

## Sheet: Rates
	Motor neurone disease (ICD-10 G12.2), 1959–2013
	Rates (deaths per 100,000)
	Males																						Females																						Persons
		Age group (years)																			Age-standardised rate			Age group (years)																			Age-standardised rate			Age group (years)
	Year	0–4	5–9	10–14	15–19	20–24	25–29	30–34	35–39	40–44	45–49	50–54	55–59	60–64	65–69	70–74	75–79	80–84	85+	Crude rate	Australian standard (2001)		Year	0–4	5–9	10–14	15–19	20–24	25–29	30–34	35–39	40–44	45–49	50–54	55–59	60–64	65–69	70–74	75–79	80–84	85+	Crude rate	Australian standard (2001)		Year	0–4	5–9	10–14	15–19
	1900																						1900																						1900
	1901																						1901																						1901
	1902																						1902																						1902
	1903																						1903																						1903
	1904																						1904																						1904
	1905																						1905																						1905
	1906																						1906																						1906
	1907																						1907																						1907
	1908																						1908																						1908
	1909																						1909																						1909
	1910																						1910																						1910
	1911																						1911																						1911
	1912																						1912																						1912
	1913																						1913																						1913
	1914																						1914																						1914
	1915																						1915																						1915
	1916																						1916																						1916
	1917																						1917																						1917
	1918																						1918																						1918
	1919																						1919																						1919
	1920																						1920																						1920
	1921																						1921																						1921
	1922																						1922																						1922
	1923																						1923																						1923
	1924																						1924																						1924
	1925																						1925																						1925
	1926																						1926																						1926
	1927																						1927																						1927
	1928																						1928																						1928
	1929																						1929																						1929
	1930																						1930																						1930
	1931																						1931																						1931
	1932																						1932																						1932
	1933																						1933																						1933
	1934																						1934																						1934
	1935																						1935																						1935
	1936																						1936																						1936
	1937																						1937																						1937
	1938																						1938																						1938
	1939																						1939																						1939
	1940																						1940																						1940
	1941																						1941																						1941
	1942																						1942																						1942
	1943																						1943																						1943
	1944																						1944																						1944
	1945																						1945																						1945
	1946																						1946																						1946
	1947																						1947																						1947
	1948																						1948																						1948
	1949																						1949																						1949
	1950																						1950																						1950
	1951																						1951																						1951
	1952																						1952																						1952
	1953																						1953																						1953
	1954																						1954																						1954
	1955																						1955																						1955
	1956																						1956																						1956
	1957																						1957																						1957
	1958																						1958																						1958
	1959	0	0	0	0.540103	0.602773	0	0.25641	0	0.606428	1.84275	3.25027	2.65369	6.09081	5.27704	6.2333	7.77605	13.0719	0	1.24011	1.70697		1959	0	0	0	0	0	0	0	0.55325	1.23877	0.325945	1.96078	2.24517	1.47565	3.85463	5.743	5.64334	0	0	0.803826	0.945607		1959	0	0	0	0.276243
	1960	0.535714	0	0	0.50813	0	0	0.257003	0.77002	0.602047	1.50376	3.51247	2.59403	6.47249	6.02007	10.4167	3.01205	3.1348	13.0719	1.34815	1.81139		1960	0	0	0	0	0	0	0	0.540249	0.309119	0.314961	1.14112	3.57302	1.93892	4.90463	2.78746	5.43478	1.96464	0	0.747634	0.874245		1960	0.274549	0	0	0.260078
	1961	0	0	0	0.480769	0.277701	0	0.516929	0.507485	0.8726	0.595948	1.71116	5.8873	3.15789	3.34896	6.83761	2.89855	6.00601	0	1.01651	1.31493		1961	0	0	0	0	0	0	0	0	0.299043	0.309024	0.735024	2.20264	1.91847	4.31034	2.0339	4.17973	3.73832	0	0.577378	0.683153		1961	0	0	0	0.246822
	1962	0.856458	0	0.192976	0.222025	0	0.291545	0	0	0.562114	0.298775	3	3.26531	6.16333	2.68637	5.87741	4.21348	0	12.2699	1.03719	1.37012		1962	0.718133	0	0.202143	0	0	0	0	0.269906	0.58072	0.612745	1.06383	2.58065	3.32858	3.22928	3.26797	3.00601	3.59712	0	0.792258	0.878302		1962	0.78892	0	0.197453	0.11374
	1963	0.338181	0	0.190042	0.208117	0	0	0	0.252398	1.88934	0.604778	1.30039	2.3678	3.52823	4.62657	5.03778	6.77507	5.76369	0	0.92729	1.22291		1963	0.532481	0	0	0	0	0	0	0	0	0.306937	2.06327	0.415455	4.7259	1.59659	2.56904	2.849	5.24476	3.20513	0.647309	0.76639		1963	0.432975	0	0.0971157	0.106655
	1964	1.34093	0	0	0	0.251572	0	0.275862	0.251067	1.30276	0.612557	2.2194	3.443	6.38821	5.87851	6.82012	9.17431	5.55556	0	1.30236	1.65668		1964	0.352672	0	0.194932	0	0	0.294031	0	0	0.543626	0.929944	1.65289	2.00481	4.69484	3.71156	2.52685	3.64631	0	6.0423	0.833877	0.972106		1964	0.859328	0	0.095338	0
	1965	0.837661	0	0.183925	0.192345	0	0.269179	0	0.50226	0.508776	0.911854	1.55521	1.86012	4.78469	6.34921	12.1317	2.55754	5.40541	5.74713	1.11996	1.50672		1965	0.352547	0.181324	0.192086	0	0	0	0	0	0	0	2.23571	1.94401	2.32234	5.73813	5	1.76991	4.90998	0	0.799801	0.895441		1965	0.601271	0.0883783	0.187917	0.0987167
	1966	0.504325	0	0	0.184893	0	0	0	0	1.00522	0.292081	2.77043	4.34054	4.63598	3.71014	11.2767	7.56496	2.60044	5.58316	1.14695	1.57486		1966	0.353733	0	0	0	0	0	0	0	0.528396	0.297991	0.93875	1.12272	2.28334	2.05997	3.08429	2.57285	1.56855	0	0.503655	0.571754		1966	0.430941	0	0	0.0947473
	1967	0.339087	0.16318	0	0.186368	0	0	0.274583	0.763893	0.75086	1.408	1.23323	3.54101	3.60424	4.83629	6.09645	5.01146	2.53383	0	0.976543	1.24886		1967	0.714787	0	0	0	0	0	0.292045	0	0	0.867714	2.4903	2.17103	3.56197	5.11208	3.70966	3.33525	0	0	0.853278	0.951449		1967	0.521999	0.0835065	0	0.0953082
	1968	0	0	0	0.551415	0	0	0.26812	0.259173	0.247541	0.811131	2.18633	4.5075	3.93854	11.2506	7.7743	7.56363	9.75753	5.39665	1.27415	1.79488		1968	0	0	0	0.191574	0	0	0	0.558639	0	1.39495	0.938891	2.81477	5.59065	4.05626	1.84697	5.77443	2.83463	2.55892	0.888457	1.04079		1968	0	0	0	0.375218
	1969	0	0	0	0	0	0	0	0.262131	0.244708	0.781226	1.58354	3.73298	6.3973	6.88196	6.87858	7.74074	9.47508	5.29129	1.08587	1.57305		1969	0	0	0	0	0	0.246672	0	0.281663	0.786689	0.270425	1.58252	2.72318	3.72839	3.50452	6.177	1.63995	0	4.91727	0.804225	0.961203		1969	0	0	0	0
	1970	0	0	0.164012	0	0	0.218113	0	0.264467	0.734304	1.52753	0.314277	3.00121	5.02285	2.24349	6.71186	10.4369	7.04143	0	0.905916	1.29864		1970	0	0	0	0	0	0	0	0.281584	0.79163	0	0.630015	1.33361	2.81626	3.4653	4.26671	7.33204	2.66688	0	0.675744	0.816356		1970	0	0	0.0840928	0
	1971	0	0	0	0.173079	0.171955	0	0	0	0.480797	1.22677	2.65274	4.24048	4.81599	6.85542	7.87123	10.2795	4.56423	0	1.15714	1.60056		1971	0	0	0	0	0	0	0	0	0	1.5374	1.1826	1.29063	4.11919	5.2531	4.65276	1.59094	5.12361	0	0.76931	0.895672		1971	0	0	0	0.0880052
	1972	0	0.157904	0	0	0.173971	0	0	0.508638	0.242166	0.735642	1.41809	2.91441	4.28541	5.64241	10.6161	9.01411	0	4.62107	0.987262	1.41138		1972	0	0	0	0	0.180605	0	0	0	0	0.256856	1.71684	4.12802	3.64717	3.22566	3.4357	5.48465	2.48886	4.1542	0.831003	0.986256		1972	0	0.0810139	0	0
	1973	0	0.159143	0	0	0.172739	0	0	0.249931	0.743205	1.21248	2.18219	4.22653	3.02581	7.47898	9.49099	10.2939	11.1844	13.3262	1.23842	1.89998		1973	0	0	0	0	0	0	0	0.263878	0	0.512711	1.93567	1.89665	3.19169	7.09434	5.59892	1.55745	4.81319	3.95546	0.877755	1.03064		1973	0	0.0816382	0	0
	1974	0.151203	0	0	0.161867	0	0	0	0.242924	0.757023	0.724092	1.30895	5.2537	7.696	4.36753	7.68618	5.07054	6.71486	4.29129	1.14664	1.54963		1974	0	0	0	0	0.175517	0	0	0.512735	0	0.770337	2.13741	2.54273	4.44618	4.29444	5.42856	0.772768	1.171	0	0.834199	0.938785		1974	0.0772664	0	0	0.0824626
	1975	0	0	0	0	0.169946	0.168981	0	0.705902	1.28665	1.20255	1.80689	4.1967	9.67638	7.08985	9.62954	8.35721	15.89	0	1.50663	2.06863		1975	0	0	0	0	0	0.176137	0	0.248453	0.548324	1.80274	1.3199	2.81288	4.66841	6.25563	7.03753	3.67782	2.31281	3.57526	1.09766	1.27		1975	0	0	0	0
	1976	0	0	0.153307	0.310704	0	0	0.397779	0.691855	1.55544	1.70187	2.03304	3.72838	6.40248	5.49937	6.01685	11.2648	6.82051	16.0559	1.3794	1.98214		1976	0	0	0	0	0	0	0	0.244142	0.275032	0.260286	1.30567	1.21835	2.29854	5.24342	7.41266	4.23953	1.11903	1.67543	0.771313	0.889498		1976	0	0	0.0788572	0.158632
	1977	0	0	0	0.303591	0.166226	0	0.370771	0.452827	0.767022	1.49038	1.51634	3.61868	6.70928	5.34962	10.334	10.8921	9.10249	0	1.33714	1.80565		1977	0.3429	0	0	0	0	0	0	0	0	0.795311	1.04741	3.23461	3.59256	1.94309	4.64698	8.35277	5.54705	0	0.874776	1.00759		1977	0.167558	0	0	0.155096
	1978	0.502946	0	0	0	0	0	0	0.443306	0.756237	1.26916	1.25634	1.7429	6.00643	4.3387	7.49265	6.28351	11.1622	0	1.03046	1.39962		1978	0.17603	0.153219	0.164585	0	0	0	0	0.468139	0	0.269906	1.56895	2.27235	4.8928	7.90972	5.96623	2.73971	3.27439	4.58211	1.08666	1.18487		1978	0.343474	0.075071	0.0802296	0
	1979	0	0	0	0.149141	0	0	0	0	0.741688	1.29452	1.00474	3.91132	6.81045	9.63488	12.7266	10.0266	13.1102	3.76676	1.4751	2.01627		1979	0	0	0	0	0	0	0	0.225308	0	0.822143	1.04983	2.19843	6.57804	3.27005	5.77637	5.33362	5.38573	1.46722	0.977696	1.09719		1979	0	0	0	0.0761291
	1980	0	0	0	0	0	0	0.166713	0	0.964643	1.31542	3.02644	3.27993	5.66797	10.9855	14.6964	17.5833	10.1616	7.3295	1.7307	2.40417		1980	0	0	0	0	0	0	0.172221	0	0.506105	0.830059	1.58718	3.23466	3.89076	7.77841	7.90826	4.61537	3.07201	4.20145	1.19609	1.31547		1980	0	0	0	0
	1981	0	0	0	0	0.151552	0.160666	0.160706	0.396685	0.468185	1.59012	1.76969	5.13323	5.48232	6.79606	8.52132	12.2421	13.4471	3.59919	1.45	1.95331		1981	0	0	0	0	0	0	0	0	0.491856	0.279069	1.84667	1.61963	4.04611	8.03996	7.09752	4.53309	9.79749	9.35766	1.23077	1.36798		1981	0	0	0	0
	1982	0	0	0	0.151951	0	0.157932	0	0.548202	0.675606	2.08601	1.0197	4.27663	5.25529	10.6922	9.26299	11.7324	3.64451	17.5685	1.53016	2.0711		1982	0	0	0	0	0	0	0	0	0.237103	1.09645	1.07	2.68719	7.23552	7.57792	9.38078	7.4517	10.4788	5.14595	1.49934	1.63522		1982	0	0	0	0.0775799
	1983	0.16662	0	0	0	0	0.155902	0	0.171817	1.09384	1.52629	1.55703	3.68926	7.82561	8.3383	11.0233	10.3937	8.65516	10.3381	1.57422	2.07517		1983	0	0	0	0	0	0	0	0.178862	0.230727	0.534811	0.816858	2.93976	3.49288	10.9864	4.53829	8.28667	10.1568	3.73767	1.31048	1.40508		1983	0.0854529	0	0	0
	1984	0	0.164542	0	0	0	0	0.159528	0.165901	1.05035	2.22134	2.3689	3.13711	5.96175	8.42085	8.54447	10.7848	8.1813	9.93476	1.5042	1.98631		1984	0	0	0	0	0	0	0	0.172422	0.442305	0.518261	2.48595	2.67077	2.24398	5.88594	7.13151	7.94461	7.97003	4.80619	1.20495	1.33875		1984	0	0.0842887	0	0
	1985	0	0	0	0	0	0	0	0.800487	0.604797	1.90401	2.13333	6.75172	9.28381	11.8153	7.31204	9.49893	14.1922	18.5145	1.95364	2.53197		1985	0	0	0	0	0	0	0	0.331666	0.211648	0.752838	0.83789	3.2091	3.57281	7.52314	10.4167	7.60952	10.3979	7.88191	1.46732	1.56357		1985	0	0	0	0
	1986	0	0	0	0	0	0.29336	0.157308	0.31165	0.769058	0.23085	1.85677	3.89778	5.40388	6.76559	10.0313	12.0535	10.5515	17.2876	1.48747	1.99341		1986	0.169645	0	0	0	0	0	0	0.320028	0.202341	0.244444	0.555784	3.2371	1.90303	7.89217	12.128	10.9546	8.42574	6.34323	1.48413	1.55362		1986	0.0827482	0	0	0
	1987	0	0	0	0	0	0	0.154139	0.314815	0.889161	0.447763	2.59983	3.41772	5.34615	9.32217	11.7425	15.2539	9.94784	13.7916	1.67524	2.19262		1987	0.168201	0	0	0	0	0	0.15469	0	0.373224	0.474243	1.63016	3.81253	5.70163	8.85684	9.73043	9.55388	7.27091	5.14435	1.64506	1.71404		1987	0.0820557	0	0	0
	1988	0	0	0	0	0	0	0	0.312025	1.00646	1.30158	2.28488	5.0626	8.03035	9.2374	12.6957	19.5559	25.7501	15.8374	2.15785	2.86755		1988	0.333254	0	0	0	0	0	0	0.315221	0.87717	0.689257	1.32492	2.47573	4.59379	4.55484	6.35469	7.7722	8.5233	8.01499	1.32799	1.4047		1988	0.162661	0	0	0
	1989	0	0	0	0.138476	0	0.139326	0.293567	0.308149	0.645469	1.8661	3.69522	3.77195	5.75778	8.46994	16.0225	14.6865	16.8687	20.01	2.05065	2.71054		1989	0.164794	0	0	0	0	0	0	0	0	1.31602	2.31257	3.04716	4.58714	7.58296	13.5435	9.31181	11.21	6.78242	1.7563	1.85484		1989	0.0803955	0	0	0.0707628
	1990	0	0	0	0	0	0	0.429091	0.304742	0.468413	1.39033	2.85536	3.27039	6.52502	15.2969	12.8506	14.8832	18.5699	14.4349	2.15009	2.69786		1990	0	0	0	0.14599	0	0.141487	0.143999	0.456984	0.484845	0.835699	1.49671	2.78445	2.69794	5.16407	7.75944	10.8749	7.89521	7.57511	1.41457	1.48645		1990	0	0	0	0.0713062
	1991	0	0	0	0	0	0	0.140098	0.301101	0.763198	1.32954	1.61379	1.63353	7.36138	7.49667	8.75297	16.3529	18.9544	20.3528	1.74107	2.27885		1991	0	0	0	0	0	0	0.140459	0.150566	0.312924	0.795787	1.45218	1.95177	4.86369	8.25627	9.21133	7.09528	10.3153	6.36207	1.52273	1.55167		1991	0	0	0	0
	1992	0	0	0	0.147685	0	0.144342	0.275655	0.296231	0.153159	1.42514	2.46791	3.47787	8.83075	7.69984	9.62174	18.5248	20.3827	19.0275	2.02107	2.58495		1992	0	0.160503	0	0	0	0	0	0	0.311918	0.185851	0.471901	3.55162	4.38445	6.80621	9.5794	11.7959	13.8765	12.1288	1.6989	1.72127		1992	0	0.078201	0	0.0756878
	1993	0	0	0	0	0	0.146313	0	0.730556	0.459898	0.840801	1.31861	4.17953	5.03716	13.3631	16.3903	12.8799	25.7887	13.9248	2.17491	2.66152		1993	0	0	0	0	0	0	0.274133	0	0.309534	0.174851	0.923506	2.66664	5.29385	6.20286	10.5619	14.3704	8.22592	4.93709	1.6266	1.63828		1993	0	0	0	0
	1994	0.150426	0	0.152663	0	0.137395	0.440879	0.409235	0.43248	0.912759	1.30078	1.47866	3.56474	5.364	8.7474	17.4845	20.8753	19.3296	18.8055	2.30153	2.82446		1994	0.158452	0	0	0	0	0	0	0.287293	0.457687	0.336477	1.77102	1.82042	3.65296	7.92207	7.58524	11.8843	13.794	10.2291	1.6887	1.67907		1994	0.154335	0	0.0783526	0
	1995	0	0	0	0	0	0.145266	0.549318	0.564528	0.904338	1.10558	3.23687	3.20878	6.81578	11.6799	11.5239	20.1312	22.4976	12.369	2.33248	2.79356		1995	0	0	0	0	0	0	0.137228	0.281656	0.15026	0.813644	0.843681	3.04593	6.19068	6.519	10.2574	10.7514	9.89621	13.4525	1.80221	1.78352		1995	0	0	0	0
	1996	0	0	0	0	0.283772	0	0	0.69083	0.593961	1.38116	2.71855	5.50507	5.68035	10.4232	14.1947	10.6317	21.8349	29.9985	2.32755	2.82153		1996	0	0	0	0	0.146206	0	0	0	0	0.62779	1.41422	2.46585	2.25412	6.79889	9.52641	8.65612	5.69035	9.93598	1.4193	1.38845		1996	0	0	0	0
	1997	0	0	0	0	0	0.138565	0.141376	0.136184	1.02427	0.92681	3.06248	3.00698	5.83833	7.74457	10.339	13.7544	16.6412	14.1518	1.91128	2.23927		1997	0	0	0	0	0	0	0.140335	0.270468	0.145212	1.09421	2.05804	3.10285	3.8703	10.2735	13.1534	12.151	10.06	10.0917	2.0719	2.00975		1997	0	0	0	0
	1998	0	0	0	0	0.149974	0.137598	0	0.40399	0.723333	1.22746	2.20752	4.92678	7.83977	6.89494	13.9513	20.0392	23.6018	29.4772	2.49915	2.96928		1998	0	0	0	0	0	0	0	0.133554	0.429252	0.922546	1.40465	2.55203	4.8601	6.6266	11.5423	17.2084	12.7035	14.7509	2.13574	2.03047		1998	0	0	0	0
	1999	0	0	0	0	0	0	0.143347	0.401637	0.284835	1.67017	2.45619	4.93252	8.10182	11.4524	16.7342	19.9118	13.3993	29.0163	2.68733	3.05409		1999	0	0	0	0	0	0	0	0.397891	0.562886	1.20897	0.672892	3.11135	2.88013	7.84783	12.3737	15.043	8.79131	8.47637	1.94254	1.83732		1999	0	0	0	0
	2000	0.153087	0	0	0	0.153956	0	0.284006	0.67199	1.11772	1.2062	1.42744	4.72207	7.03102	9.09347	11.7574	20.1658	28.7621	32.4515	2.6791	3.08006		2000	0	0	0	0	0.15865	0	0	0	0.137981	0.596831	0.807434	3.40087	5.32565	5.83283	10.8588	16.4378	13.771	15.5098	2.12825	1.96718		2000	0.0785097	0	0	0
	2001	0	0	0	0	0	0.14403	0.276835	0.678539	0.548004	1.19242	2.93151	5.10384	6.80962	11.4004	13.5986	22.1414	20.4109	39.328	2.92831	3.28336		2001	0.161126	0	0	0	0	0	0	0.13402	0.270182	0.588808	2.48503	1.62417	4.68806	8.41612	9.92296	9.65427	13.9695	12.0829	1.96646	1.81521		2001	0.0785123	0	0	0
	2002	0	0	0	0.14493	0	0	0	0	0.536836	1.46826	2.0168	4.76292	9.21859	13.7668	16.588	24.2106	19.1554	25.9974	3.03861	3.28477		2002	0	0	0	0	0	0.146689	0	0.135548	0.39711	1.01504	1.55349	3.19537	5.52584	7.66923	10.9182	11.2994	13.8474	10.6424	2.108	1.93824		2002	0	0	0	0.0739694
	2003	0	0	0	0	0	0	0.401218	0.13872	1.32406	1.01045	4.48049	3.63258	5.0707	11.9762	17.0452	21.465	18.7555	12.6224	2.80968	2.9634		2003	0.161676	0	0	0	0	0	0.131367	0.273622	0.783574	0.853586	1.84579	3.70972	4.21336	9.14252	15.0318	13.5698	18.7461	12.9994	2.56716	2.33101		2003	0.0787938	0	0	0
	2004	0	0	0	0	0	0	0.13355	0.693933	1.18503	1.69735	2.75975	4.01467	5.54951	8.86122	18.4725	16.0483	21.0297	23.3871	2.7587	2.92641		2004	0	0	0	0	0	0	0.131524	0.136825	0.648711	0.557622	2.28038	2.03691	4.94571	8.07428	14.2419	16.5261	11.429	11.7057	2.33143	2.12552		2004	0	0	0	0
	2005	0	0	0	0	0	0.14691	0	0.274014	0.527532	1.52887	2.42819	4.06108	7.02863	7.77603	12.4563	20.6301	24.0048	26.9399	2.72465	2.86133		2005	0	0	0	0.148456	0	0	0	0.135408	0.129972	0.956799	1.20025	3.43786	6.44084	6.02214	12.1093	10.7883	18.4086	9.72384	2.22502	1.97377		2005	0	0	0	0.0724884
	2006	0	0	0	0	0	0	0	0.266684	0.398425	2.05032	2.68592	4.92929	5.50002	10.732	17.3135	18.0004	23.1132	21.3042	2.89386	2.97558		2006	0	0	0	0	0	0.145905	0.135094	0	0.523918	0.268046	1.47564	3.33811	4.50886	6.13676	15.1333	15.5046	16.0317	9.74813	2.3223	2.07664		2006	0	0	0	0
	2007	0	0	0	0	0.131991	0	0.137691	0.776737	1.33899	1.33744	3.37294	3.99573	7.18701	14.6052	15.893	18.6998	25.85	26.1443	3.29353	3.3456		2007	0	0	0	0	0.137833	0	0.136832	0.127678	0.132031	0.656037	1.73621	2.38654	6.0786	6.4433	12.9543	16.5333	14.9585	14.146	2.42506	2.12552		2007	0	0	0	0
	2008	0	0	0	0.134453	0	0	0.137361	0.633918	0.268587	1.70603	3.46143	4.27693	9.28692	11.4381	16.6843	20.6727	24.4242	19.6008	3.24441	3.24262		2008	0	0	0	0	0	0.135069	0	0.124874	0.397472	0.773376	1.98734	3.29515	4.66211	10.3303	11.7573	16.2495	13.901	13.1795	2.51003	2.20652		2008	0	0	0	0.0690793
	2009	0.136618	0	0	0	0	0	0.135445	0.627927	0.932774	1.68736	2.82041	6.57024	8.28303	12.5471	16.9881	19.7989	27.6295	15.3217	3.38864	3.34631		2009	0	0	0	0	0	0	0	0	0.1313	1.02041	1.24833	1.85206	3.63308	8.72592	11.6924	13.8971	12.1141	13.1028	2.13941	1.86316		2009	0.0701418	0	0	0
	2010	0	0	0	0	0	0.242023	0	0.755375	1.04869	2.07639	3.03971	3.8534	8.20718	11.967	14.2429	24.4322	19.8571	27.3589	3.33703	3.30636		2010	0	0	0	0	0.128043	0	0	0.248065	0.645788	1.0201	1.08573	2.72882	5.85925	10.0623	13.8556	16.2138	14.7614	9.4114	2.54883	2.2336		2010	0	0	0	0
	2011	0	0	0	0	0.121437	0	0.39001	0.383532	1.39816	2.48643	2.83927	3.02083	7.85343	12.4406	18.752	19.736	23.6131	30.9197	3.51675	3.4333		2011	0	0	0	0	0	0	0.130387	0.126309	0.249845	1.28586	1.59059	2.52254	5.69289	7.29156	11.0699	14.0033	18.9379	15.8768	2.54861	2.14118		2011	0	0	0	0
	2012	0	0	0	0	0	0	0	0.258113	1.11073	1.31685	1.85673	4.43979	8.0568	13.1881	15.3615	22.452	23.3504	31.9969	3.44742	3.2965		2012	0	0	0	0	0	0	0.252316	0	0	0.905206	1.29921	3.18659	5.35864	7.7581	12.4881	15.7033	17.7813	12.0712	2.5229	2.1327		2012	0	0	0	0
	2013	0.256608	0	0	0	0	0.114601	0	0.387726	0.850192	2.10927	2.09097	5.23048	6.67181	9.31918	15.9126	25.5908	26.2292	21.9062	3.37922	3.24262		2013	0	0	0	0	0	0	0.121378	0.256813	0.238364	0.12956	1.27828	3.82482	6.70125	8.99543	13.0508	16.9576	18.2011	13.1159	2.77244	2.31201		2013	0.131819	0	0	0
	2014																						2014																						2014
	2015																						2015																						2015
	2016																						2016																						2016
	2017																						2017																						2017
	2018																						2018																						2018
	2019																						2019																						2019
	2020																						2020																						2020
	2021																						2021																						2021
	2022																						2022																						2022
	2023																						2023																						2023
	2024																						2024																						2024
	2025																						2025																						2025
[truncated: 17 more columns]

## Sheet: Populations
	Motor neurone disease (ICD-10 G12.2), 1959–2013
	Populations
	Standard populations
			Age group (years)
	Population		0–4	5–9	10–14	15–19	20–24	25–29	30–34	35–39	40–44	45–49	50–54	55–59	60–64	65–69	70–74	75–79	80–84	85+	Total
	Australian standard (2001)		1282357	1351664	1353177	1352745	1302412	1407081	1466615	1492204	1479257	1358594	1300777	1008799	822024	682513	638380	519356	330050	265235	19413240
	OECD standard (2010)		6317	6160	6201	6623	6770	7012	6941	7168	7098	7109	6601	5977	5404	4207	3584	2877	2135	1816	100000
	WHO world standard		8.86	8.69	8.6	8.47	8.22	7.93	7.61	7.15	6.59	6.04	5.37	4.55	3.72	2.96	2.21	1.52	0.91	0.63	100
	Segi world standard		12000	10000	9000	9000	8000	8000	6000	6000	6000	6000	5000	4000	4000	3000	2000	1000	500	500	100000
	Australian estimated resident population
		Males																					Females																					Persons
			Age group (years)																					Age group (years)																					Age group (years)
	ABS status	Year	0–4	5–9	10–14	15–19	20–24	25–29	30–34	35–39	40–44	45–49	50–54	55–59	60–64	65–69	70–74	75–79	80–84	85+	Total		Year	0–4	5–9	10–14	15–19	20–24	25–29	30–34	35–39	40–44	45–49	50–54	55–59	60–64	65–69	70–74	75–79	80–84	85+	Total			0–4	5–9	10–14	15–19	20–24
		1900	215852	231478	218913	187231	170562	159877	155752	152875	124938	85032.4	63808.8	51128.6	45756.8	38538.3	25720.5	12096.8	5808.5	2094.6	1.94746e+06		1900	210919	226185	215175	185647	173160	154063	134168	118951	92657.3	61946.7	49717.8	41849.3	36520.9	29920	17747.6	9082.8	4802.2	1897.8	1.76441e+06		1900	426771	457663	434088	372878	343721
		1901	220204	231368	218699	190656	175490	163326	157129	152877	126681	89111	67563	52913	46257	38701	26015	12668	6063	2207	1977928		1901	214913	226020	214983	188771	177021	157030	136394	120744	95391	65888	52686	43136	37166	30485	18450	9710	5047	2038	1795873		1901	435117	457388	433682	379427	352511
		1902	224991	231247	218464	194423	180911	167120	158644	152880	128598	93597.5	71692.6	54875.8	46807.2	38880	26339	13296.3	6343	2330.6	2.01144e+06		1902	219307	225839	214772	192208	181268	160294	138842	122716	98398.1	70223.4	55951	44551.4	37875.6	31106.5	19222.6	10399.9	5316.3	2192.2	1.83048e+06		1902	444298	457086	433235	386631	362180
		1903	229778	231126	218228	198191	186332	170913	160158	152882	130514	98084	75822.2	56838.6	47357.4	39059	26663	13924.6	6623	2454.2	2.04495e+06		1903	223700	225657	214560	195644	185516	163558	141291	124689	101405	74558.8	59216	45966.8	38585.2	31728	19995.2	11089.8	5585.6	2346.4	1.86509e+06		1903	453478	456783	432788	393835	371848
		1904	234565	231005	217992	201958	191754	174707	161673	152885	132431	102570	79951.8	58801.4	47907.6	39238	26987	14552.9	6903	2577.8	2.07846e+06		1904	228094	225476	214349	199081	189763	166822	143739	126661	104412	78894.2	62481	47382.2	39294.8	32349.5	20767.8	11779.7	5854.9	2500.6	1.8997e+06		1904	462659	456481	432342	401039	381517
		1905	239352	230884	217757	205725	197175	178501	163188	152887	134348	107057	84081.4	60764.2	48457.8	39417	27311	15181.2	7183	2701.4	2.11197e+06		1905	232488	225294	214138	202518	194011	170086	146188	128633	107419	83229.6	65746	48797.6	40004.4	32971	21540.4	12469.6	6124.2	2654.8	1.93431e+06		1905	471839	456179	431895	408243	391185
		1906	244138	230764	217522	209492	202596	182294	164702	152890	136264	111544	88211	62727	49008	39596	27635	15809.5	7463	2825	2.14548e+06		1906	236882	225113	213926	205954	198258	173350	148636	130606	110426	87565	69011	50213	40714	33592.5	22313	13159.5	6393.5	2809	1.96892e+06		1906	481020	455876	431448	415447	400854
		1907	248925	230643	217286	213260	208017	186088	166217	152893	138181	116030	92340.6	64689.8	49558.2	39775	27959	16437.8	7743	2948.6	2.17899e+06		1907	241275	224932	213715	209391	202505	176613	151084	132578	113434	91900.4	72276	51628.4	41423.6	34214	23085.6	13849.4	6662.8	2963.2	2.00353e+06		1907	490201	455574	431001	422651	410523
		1908	253712	230522	217050	217027	213438	189882	167732	152895	140098	120516	96470.2	66652.6	50108.4	39954	28283	17066.1	8023	3072.2	2.2125e+06		1908	245669	224750	213504	212828	206753	179877	153533	134550	116441	96235.8	75541	53043.8	42133.2	34835.5	23858.2	14539.3	6932.1	3117.4	2.03814e+06		1908	499381	455272	430554	429855	420191
		1909	258499	230401	216815	220794	218860	193676	169247	152898	142015	125003	100600	68615.4	50658.6	40133	28607	17694.4	8303	3195.8	2.24601e+06		1909	250063	224569	213293	216265	211000	183141	155981	136522	119448	100571	78806	54459.2	42842.8	35457	24630.8	15229.2	7201.4	3271.6	2.07275e+06		1909	508562	454970	430108	437059	429860
		1910	263286	230280	216580	224562	224281	197469	170761	152900	143931	129490	104729	70578.2	51208.8	40312	28931	18322.7	8583	3319.4	2.27952e+06		1910	254456	224387	213081	219701	215248	186405	158430	138495	122455	104907	82071	55874.6	43552.4	36078.5	25403.4	15919.1	7470.7	3425.8	2.10736e+06		1910	517742	454667	429661	444263	439528
		1911	268073	230159	216344	228329	229702	201263	172276	152903	145848	133976	108859	72541	51759	40491	29255	18951	8863	3443	2313035		1911	258850	224206	212870	223138	219495	189669	160878	140467	125462	109242	85336	57290	44262	36700	26176	16609	7740	3580	2141970		1911	526923	454365	429214	451467	449197
		1912	271996	237363	221570	229276	228742	203607	177758	157503	148323	135208	111473	77026.9	55683.1	42171.9	29689.5	19035.9	8926.7	3568.7	2.35892e+06		1912	262595	231295	217803	224104	220546	194432	166900	145550	129106	112048	88812.4	61611	47715.8	38030	26758.4	17018.1	7996	3772	2196093		1912	534591	468658	439373	453380	449287
		1913	275918	244567	226795	230223	227782	205950	183241	162102	150798	136441	114087	81512.8	59607.2	43852.8	30124	19120.8	8990.4	3694.4	2404808		1913	266340	238385	222736	225070	221596	199195	172922	150634	132750	114854	92288.8	65932	51169.6	39360	27340.8	17427.2	8252	3964	2250216		1913	542258	482952	449531	455294	449378
		1914	279841	251771	232021	231170	226821	208294	188723	166702	153274	137673	116701	85998.7	63531.3	45533.7	30558.5	19205.7	9054.1	3820.1	2.45069e+06		1914	270085	245474	227669	226037	222646	203958	178945	155717	136393	117659	95765.2	70253	54623.4	40690	27923.2	17836.3	8508	4156	2304339		1914	549926	497246	459690	457207	449468
		1915	283764	258975	237246	232117	225861	210638	194206	171302	155749	138906	119315	90484.6	67455.4	47214.6	30993	19290.6	9117.8	3945.8	2496581		1915	273830	252564	232602	227003	223697	208721	184967	160800	140037	120465	99241.6	74574	58077.2	42020	28505.6	18245.4	8764	4348	2358462		1915	557594	511539	469848	459120	449558
		1916	287686	266180	242472	233064	224901	212982	199688	175902	158224	140138	121930	94970.5	71379.5	48895.5	31427.5	19375.5	9181.5	4071.5	2.54247e+06		1916	277575	259653	237535	227969	224748	213484	190989	165884	143681	123271	102718	78895	61531	43350	29088	18654.5	9020	4540	2412585		1916	565262	525832	480007	461034	449648
		1917	291609	273384	247698	234012	223941	215325	205170	180501	160699	141370	124544	99456.4	75303.6	50576.4	31862	19460.4	9245.2	4197.2	2588354		1917	281320	266742	242468	228935	225798	218248	197011	170967	147325	126077	106194	83216	64984.8	44680	29670.4	19063.6	9276	4732	2466708		1917	572929	540126	490166	462947	449739
		1918	295532	280588	252923	234959	222981	217669	210653	185101	163174	142603	127158	103942	79227.7	52257.3	32296.5	19545.3	9308.9	4322.9	2.63424e+06		1918	285065	273832	247401	229901	226848	223011	203033	176050	150969	128883	109671	87537	68438.6	46010	30252.8	19472.7	9532	4924	2520831		1918	580597	554420	500324	464860	449829
		1919	299455	287792	258149	235906	222020	220013	216135	189701	165650	143835	129772	108428	83151.8	53938.2	32731	19630.2	9372.6	4448.6	2680127		1919	288810	280921	252334	230868	227899	227774	209056	181133	154612	131688	113147	91858	71892.4	47340	30835.2	19881.8	9788	5116	2574954		1919	588265	568713	510483	466773	449919
		1920	303377	294996	263374	236853	221060	222356	221618	194300	168125	145068	132386	112914	87075.9	55619.1	33165.5	19715.1	9436.3	4574.3	2.72601e+06		1920	292555	288011	257267	231834	228950	232537	215078	186217	158256	134494	116624	96179	75346.2	48670	31417.6	20290.9	10044	5308	2629077		1920	595932	583006	520641	468687	450010
	Final	1921	307300	302200	268600	237800	220100	224700	227100	198900	170600	146300	135000	117400	91000	57300	33600	19800	9500	4700	2771900		1921	296300	295100	262200	232800	230000	237300	221100	191300	161900	137300	120100	100500	78800	50000	32000	20700	10300	5500	2683200		1921	603600	597300	530800	470600	450100
	Final	1922	311900	305200	276200	244500	225800	221900	231300	205500	176600	147900	137600	119600	95000	62600	35200	20300	9700	4700	2831500		1922	300000	297300	269900	237700	230200	236000	227400	197200	167800	139900	124100	102900	82600	54800	33000	21400	10600	5600	2738400		1922	611900	602500	546100	482200	456000
	Final	1923	317800	305200	283900	252600	230600	222000	233600	214800	182500	152700	140000	122300	100200	67700	37400	20900	10100	4500	2898800		1923	305400	296600	276700	244700	230900	234800	231600	205000	173100	143600	126800	106300	86600	59600	34500	21900	11000	5500	2794600		1923	623200	601800	560600	497300	461500
	Final	1924	322800	301700	293000	260900	235700	222700	234100	222700	189500	158000	142100	125100	104800	72300	40000	21700	10300	4100	2961500		1924	310300	292100	286300	251600	232500	232900	235600	212100	178900	147900	129800	109900	90500	63900	36400	22200	11600	5200	2849700		1924	633100	593800	579300	512500	468200
	Final	1925	326800	300500	301200	271300	245100	230300	234500	228700	195500	164100	142100	126900	107400	76400	43000	22300	11000	4000	3031100		1925	315800	289600	295200	258500	235000	234800	238100	217400	184400	153700	131900	113300	93000	68100	38900	23100	12100	5200	2908100		1925	642600	590100	596400	529800	480100
	Final	1926	325800	306600	306300	279000	254700	236800	234700	233000	201500	169700	142200	128400	108700	79600	46200	23400	11000	3900	3091500		1926	315000	295600	299800	266700	238700	235700	240300	222900	190100	159300	133900	116700	95200	71400	42100	23600	12500	5300	2964800		1926	640800	602200	606100	545700	493400
	Final	1927	323600	312600	310100	288300	265600	246800	234200	238200	208500	175800	143700	129800	109800	82600	49800	24200	11100	4100	3158800		1927	313400	300600	302900	275500	244900	238200	240200	229900	196800	165200	136200	119600	97500	74200	45900	24300	12900	5500	3023700		1927	637000	613200	613000	563800	510500
	Final	1928	322700	319400	310400	296900	276500	254800	235400	240100	216600	181100	147000	130000	110800	85800	53100	25300	11400	4100	3221400		1928	312000	307300	302800	283100	253500	240800	240100	234200	204800	170100	139400	121200	100500	77200	49700	25200	13300	5600	3080800		1928	634700	626700	613200	580000	530000
	Final	1929	321700	324600	306800	304700	284300	260200	235900	239200	222200	186800	150400	130100	111500	88200	55900	26800	11800	4200	3265300		1929	309900	312900	298300	293300	261000	242800	238400	237300	211400	175100	142800	123100	103300	80000	53100	26400	13600	5900	3128600		1929	631600	637500	605100	598000	545300
	Final	1930	317300	326800	304800	310000	288700	263200	240000	236600	225800	191000	155500	129500	112000	89800	58900	28400	12100	4900	3295300		1930	304100	317200	294500	301600	266900	243800	239500	238600	216100	179800	147700	124600	105900	82100	56600	28000	14200	6200	3167400		1930	621400	644000	599300	611600	555600
	Final	1931	312200	323400	309700	311700	290500	266400	243000	234200	228500	195800	161000	129900	113100	91000	61900	30600	13000	5300	3321200		1931	299300	314400	298900	304700	273200	245200	239200	239300	220800	185500	152900	126700	108800	84600	59600	30600	14600	7000	3205300		1931	611500	637800	608600	616400	563700
	Final	1932	303800	318800	313900	312200	293700	270200	247900	230600	231400	201100	166400	131400	114000	91600	64200	32800	13400	5700	3343100		1932	290200	310700	302000	306000	279500	248400	239800	236900	226200	191500	158000	128600	111000	87000	61700	33600	15000	7600	3233700		1932	594000	629500	615900	618200	573200
	Final	1933	293800	316100	319300	310000	297500	275500	251600	230100	232000	207700	170900	134600	114000	92400	66600	35100	13900	6000	3367100		1933	280200	307900	307300	304000	285100	254300	240300	235500	229100	198900	162200	131500	111900	90200	64000	36500	15600	8200	3262700		1933	574000	624000	626600	614000	582600
	Final	1934	283700	314700	323100	305500	302900	280500	255300	230000	231000	213000	176500	138200	114600	93300	68300	37200	14500	6100	3388400		1934	271400	305400	312200	298100	293400	259900	240500	233300	231200	205100	167100	134900	113700	92600	66500	39100	16200	8400	3289000		1934	555100	620100	635300	603600	596300
	Final	1935	275300	311200	324700	303300	307300	284300	258200	234500	229200	217300	181200	143600	115100	94200	69800	39600	15200	6300	3410300		1935	264400	300000	316500	293900	300800	264800	240400	234600	232200	210100	172300	139900	115200	94600	68400	42000	17200	8600	3315900		1935	539700	611200	641200	597200	608100
	Final	1936	270200	306900	321200	308800	308900	287000	262400	238800	227600	220600	185900	149100	116000	95100	70600	41800	16400	6500	3433800		1936	259500	295600	314300	298300	303700	270600	241600	234700	232900	214600	178100	145000	117000	96800	70400	44000	18800	8700	3344600		1936	529700	602500	635500	607100	612600
	Final	1937	273100	299500	316600	313200	309800	290900	266600	244000	224500	223700	191100	154500	117600	96200	71100	43300	17800	6400	3459900		1937	262900	287400	310800	302000	304900	276800	244700	235400	230900	219800	184100	150100	119200	98900	72500	45700	20700	8900	3375700		1937	536000	586900	627400	615200	614700
	Final	1938	277800	290100	314000	318900	308000	295800	272600	247700	224500	224400	197500	158900	120700	96500	72100	45000	19200	6500	3490200		1938	267400	277800	308400	307600	303100	282300	250600	236000	229800	222500	191500	154800	122300	99900	75300	47500	22600	9000	3408400		1938	545200	567900	622400	626500	611100
	Final	1939	284600	281000	313100	323500	303700	301800	278600	252300	225300	223800	203000	164400	124100	97300	72600	46300	20200	6600	3522200		1939	274400	269600	306200	313100	297700	291600	257100	237000	228600	225000	198000	159900	125900	101400	77400	49400	24100	9200	3445600		1939	559000	550600	619300	636600	601400
	Final	1940	291800	273300	309800	324700	302200	306700	283400	256200	230800	222400	208000	169000	129200	97800	73600	47100	21700	6900	3554600		1940	280600	263100	301100	317700	294300	300000	262900	237900	231200	226800	203500	165500	131500	102900	79600	50800	25900	9600	3484900		1940	572400	536400	610900	642400	596500
	Final	1941	299900	269200	306100	320600	307300	307500	286400	260400	235600	220900	211500	173500	134100	98400	74700	47800	23100	7500	3584500		1941	288700	258800	297200	315800	299100	303700	269600	239700	232200	228200	208200	171000	136600	104700	81700	52300	27400	10500	3525400		1941	588600	528000	603300	636400	606400
	Final	1942	311100	272600	299400	314900	309600	306100	289900	264400	241100	218500	214800	178400	138700	99500	75200	47900	23700	7900	3613700		1942	299100	262800	289000	312400	303100	305700	276700	243500	233400	226800	213500	176600	141500	106700	82900	53600	28400	11300	3567000		1942	610200	535400	588400	627300	612700
	Final	1943	318400	276900	290400	312100	312500	300500	292400	269100	244200	218600	215200	184700	142300	101700	75000	48000	24300	8100	3634400		1943	306300	267100	279200	309800	308600	303700	282200	249300	233800	225800	215900	183700	145700	109300	83300	55400	29400	12000	3600500		1943	624700	544000	569600	621900	621100
	Final	1944	334300	283400	281100	310500	315000	292700	296300	273800	247600	219400	213800	189800	147200	104200	75400	48200	25100	8500	3666300		1944	321600	273900	270700	307300	313300	297900	290900	255000	233800	224200	217800	189300	150100	112700	84200	57000	30900	12800	3643400		1944	655900	557300	551800	617800	628300
	Final	1945	352100	289900	273300	306700	315300	288700	298800	277200	250100	224600	211800	194100	151300	108400	75800	49500	25900	9700	3703200		1945	338900	279700	263700	302100	317000	294100	298800	259800	233500	225900	218500	193800	154600	117900	85100	59000	31900	14200	3688500		1945	691000	569600	537000	608800	632300
	Final	1946	365600	296800	268400	302700	312400	293500	298500	279900	253800	229000	210300	197300	155400	112600	76100	50400	26200	10600	3739500		1946	350400	286800	258500	297000	313200	297700	301900	265400	234100	226000	219200	197800	159300	123000	86500	60600	32700	15500	3725600		1946	716000	583600	526900	599700	625600
	Final	1947	392500	306800	271300	296600	307700	298600	297500	284000	258300	234100	208000	200100	159700	116500	76900	50900	26200	11700	3797400		1947	375600	296000	262000	288200	308500	300500	303100	272100	237000	226200	217600	202800	164600	127700	88500	61400	33500	16700	3782000		1947	768100	602800	533300	584800	616200
	Final	1948	414800	315300	276700	289000	312400	307400	295700	289600	264700	237600	208900	200400	165200	119500	78700	50800	26400	12100	3865200		1948	396500	304100	267200	279300	306900	306400	301900	279000	244000	227300	217300	205200	171300	131400	91600	61800	34700	17600	3843500		1948	811300	619400	543900	568300	619300
	Final	1949	430600	334700	285800	283800	320400	324200	297600	301700	274600	243900	211100	199400	170000	123900	80700	51200	26500	12500	3972600		1949	410900	322400	276700	273200	309500	316800	300300	292400	253300	229600	217400	207900	177200	135600	95300	62800	35800	18400	3935500		1949	841500	657100	562500	557000	629900
	Final	1950	455000	358500	296600	281700	328900	346200	307900	317000	286700	250800	217900	197900	174700	127200	84200	51300	27500	12900	4122900		1950	434100	345200	286500	270000	312100	331200	302700	306200	262600	232100	221100	209600	182000	139700	100500	63800	37300	19100	4055800		1950	889100	703700	583100	551700	641000
	Final	1951	478100	380800	308000	280400	330600	358200	324200	326300	297400	258900	224100	197500	178300	130600	87600	51300	28300	13100	4253700		1951	456400	365100	297700	268000	311500	337100	314200	314700	273000	235500	223700	211600	186700	144100	105100	65500	38500	19600	4168000		1951	934500	745900	605700	548400	642100
	Final	1952	478900	416200	322500	286800	330100	365900	340200	330900	308300	267500	230200	196100	181000	134100	90500	51900	28400	13100	4372600		1952	457400	398400	310400	273700	303800	337800	324000	319700	283700	241200	225600	211200	192400	149400	108900	67200	39100	20000	4263900		1952	936300	814600	632900	560500	633900
	Final	1953	488300	444300	333800	293100	320300	367400	353900	328400	316500	276000	234500	197900	181400	139100	92600	53400	28200	13500	4462600		1953	467500	424600	320600	280300	294700	336700	334700	319800	292300	249100	226600	212000	195200	155900	111900	70100	39400	21300	4352700		1953	955800	868900	654400	573400	615000
	Final	1954	498000	461100	353700	301800	311500	366400	365700	323400	324600	284300	240000	199900	179700	143600	95500	54600	28300	14000	4546100		1954	477500	439800	339200	289900	287500	335300	344700	316200	304200	257100	227700	212000	197400	161400	114800	73300	40000	22400	4440400		1954	975500	900900	692900	591700	599000
	Final	1955	506800	481200	377200	313900	308800	367700	376400	326000	332400	292200	245400	205400	177800	147700	98000	56700	28400	14300	4656300		1955	486100	458700	361500	299500	284100	332600	354100	316600	315600	265300	229100	215100	199000	166000	118800	77100	40900	23300	4543400		1955	992900	939900	738700	613400	592900
	Final	1956	516800	500700	399100	325900	311800	369200	383300	338900	336400	300000	252100	210900	177200	150400	101000	59000	28600	14700	4776000		1956	494100	478000	381200	310600	283700	330800	356300	326800	322400	274900	232100	217700	200700	170300	122900	80800	42200	24000	4649500		1956	1010900	978700	780300	636500	595500
	Final	1957	526100	500300	435100	340300	318000	363500	386400	352200	337000	308900	259900	216400	176400	153100	104200	60900	29100	14500	4882300		1957	502300	478000	415600	323800	292700	326000	357100	337300	326200	285300	237800	219700	201100	175800	127800	83700	43300	24400	4757900		1957	1028400	978300	850700	664100	610700
	Final	1958	535300	509600	464700	350500	322600	352700	388300	366800	333700	316900	268200	220500	178300	153400	108300	62200	30300	14300	4976600		1958	510100	488000	443700	334400	302400	320100	357400	350000	326100	294400	246100	221000	202600	178600	134100	86100	45600	25100	4865800		1958	1045400	997600	908400	684900	625000
	Final	1959	547400	519300	483000	370300	331800	345500	390000	380400	329800	325600	276900	226100	180600	151600	112300	64300	30600	14700	5080200		1959	521800	497600	460100	353700	314800	315600	357400	361500	322900	306800	255000	222700	203300	181600	139300	88600	47800	25700	4976200		1959	1069200	1016900	943100	724000	646600
	Final	1960	560000	526300	502400	393600	345400	341500	389100	389600	332200	332500	284700	231300	185400	149500	115200	66400	31900	15300	5192300		1960	532700	504200	478000	375400	324400	312800	354300	370200	323500	317500	262900	223900	206300	183500	143500	92000	50900	26700	5082700		1960	1092700	1030500	980400	769000	669800
	Final	1961	573700	535600	521000	416000	360100	341100	386900	394100	343800	335600	292200	237800	190000	149300	117000	69000	33300	15800	5312300		1961	546400	511600	496700	394300	335000	312100	352300	371700	334400	323600	272100	227000	208500	185600	147500	95700	53500	27900	5195900		1961	1120100	1047200	1017700	810300	695100
	Final	1962	583800	543400	518200	450400	368800	343000	378000	393600	355800	334700	300000	245000	194700	148900	119100	71200	34300	16300	5399200		1962	557000	518300	494700	428800	347400	319600	345600	370500	344400	326400	282000	232500	210300	185800	153000	99800	55600	29600	5301300		1962	1140800	1061700	1012900	879200	716200
	Final	1963	591400	552300	526200	480500	377900	349700	369400	396200	370500	330700	307600	253400	198400	151300	119100	73800	34700	16800	5499900		1963	563400	526200	503500	457100	357400	327900	338800	369800	356700	325800	290800	240700	211600	187900	155700	105300	57200	31200	5407000		1963	1154800	1078500	1029700	937600	735300
	Final	1964	596600	565100	535900	499300	397500	359700	362500	398300	383800	326500	315400	261400	203500	153100	117300	76300	36000	17000	5605200		1964	567100	538500	513000	474100	376300	340100	334100	369400	367900	322600	302500	249400	213000	188600	158300	109700	58700	33100	5516400		1964	1163700	1103600	1048900	973400	773800
	Final	1965	596900	580000	543700	519900	420000	371500	357400	398200	393100	329000	321500	268800	209000	157500	115400	78200	37000	17400	5714500		1965	567300	551500	520600	493100	397800	350200	332200	367200	376500	323600	313100	257200	215300	191700	160000	113000	61100	35000	5626400		1965	1164200	1131500	1064300	1013000	817800
	Final	1966	594855	599016	557537	540852	440523	384461	357017	397328	397922	342371	324859	276463	215704	161719	115282	79313	38455	17911	5841588		1966	565398	570733	532171	514587	418636	362318	333185	367452	378504	335581	319574	267208	218977	194178	162112	116602	63753	36941	5757910		1966	1160253	1169749	1089708	1055439	859159
	Final	1967	589820	612820	566997	536574	476000	398982	364189	392725	399542	355114	324351	282405	221961	165416	114821	79817	39466	18321	5939321		1967	559607	584692	541309	512654	453824	373977	342413	362950	378624	345736	321246	276367	224595	195615	161740	119931	66503	37974	5859757		1967	1149427	1197512	1108306	1049228	929824
	Final	1968	587239	622063	576920	544055	507658	412074	372968	385843	403974	369854	320171	288408	228511	168880	115766	79327	40994	18530	6043235		1968	557493	592505	550198	521991	484170	385033	351603	358013	379173	358436	319526	284215	232531	197226	162428	121224	70556	39079	5965400		1968	1144732	1214568	1127118	1066046	991828
	Final	1969	594860	629400	592627	553843	530206	434921	385990	381489	408651	384012	315748	294671	234474	174369	116303	77512	42216	18899	6170191		1969	566749	597796	565128	532612	504953	405396	365509	355034	381345	369789	315952	293774	241391	199742	161891	121955	73134	40673	6092823		1969	1161609	1227196	1157755	1086455	1035159
	Final	1970	607683	630370	609712	561414	551401	458477	399791	378119	408550	392790	318191	299879	238908	178294	119192	76651	42605	19950	6291977		1970	579856	598555	579450	540941	524242	429257	377635	355134	378965	378333	317453	299938	248557	202003	164061	122749	74994	43249	6215372		1970	1187539	1228925	1189162	1102355	1075643
	Final	1971	638941	638899	640774	577771	581547	497534	425822	388710	415976	407574	339272	306569	249170	189631	127045	77825	43819	21057	6567936		1971	610824	607537	610302	558525	559060	464860	398147	366150	387450	390270	338238	309927	267043	209400	171941	125712	78070	45873	6499329		1971	1249765	1246436	1251076	1136296	1140607
	Final	1972	654921	633295	653476	592220	574808	533346	440524	393207	412940	407807	352586	308810	256685	194952	131875	77656	44405	21640	6685153		1972	627605	601061	622372	571573	553696	500789	410822	371534	383373	389323	349479	314921	274185	217010	174637	127629	80358	48144	6618511		1972	1282526	1234356	1275848	1163793	1128504
	Final	1973	662176	628365	662126	602939	578908	559262	451880	400111	403657	412379	366605	307581	264392	200562	136972	77716	44705	22512	6782848		1973	634779	596552	628762	581547	559363	528433	421255	378963	375770	390083	361632	316348	281982	225532	178606	128415	83105	50563	6721690		1973	1296955	1224917	1290888	1184486	1138271
	Final	1974	661361	631173	667319	617791	586945	577081	470295	411652	396289	414312	381987	304547	272869	206066	143114	78887	44677	23303	6889668		1974	632863	600241	631303	594880	569744	547798	440137	390065	370027	389440	374285	314623	292386	232859	184211	129405	85397	53239	6832903		1974	1294224	1231414	1298622	1212671	1156689
	Final	1975	654556	639744	664094	629462	588423	591783	486844	424988	388606	415784	387405	309767	279030	211570	145386	83760	44053	23926	6969181		1975	626040	608428	626762	604248	576429	567739	457097	402490	364748	388297	378818	319957	299888	239784	184724	135950	86475	55940	6923814		1975	1280596	1248172	1290856	1233710	1164852
	Final	1976	632298	655996	652288	643699	592784	599550	502792	433617	385744	411312	393500	321856	281141	218207	149580	88772	43985	24913	7032034		1976	605593	625093	615827	617078	580574	583738	472595	409597	363594	384193	382944	328312	304541	247930	188866	141525	89363	59686	7001049		1976	1237891	1281089	1268115	1260777	1173358
	Final	1977	610357	672458	643854	658782	601589	591963	539417	441670	391123	402583	395689	331613	283190	224315	154829	91810	43944	25516	7104702		1977	583261	643617	610098	630739	587624	579905	510873	418665	370217	377211	381893	340072	306188	257322	193674	143665	90138	62370	7087532		1977	1193618	1316075	1253952	1289521	1189213
	Final	1978	596486	679413	638834	667106	612872	596408	565999	451156	396701	393961	397982	344254	283030	230484	160157	95488	44794	26168	7181293		1978	568086	652660	607588	638674	597243	585366	541976	427224	377872	370500	382421	352058	306573	265496	201132	146001	91620	65472	7177962		1978	1164572	1332073	1246422	1305780	1210115
	Final	1979	584454	675793	641174	670508	629292	601835	582822	466350	404483	386245	398114	357935	278983	238716	165009	99735	45766	26548	7253762		1979	557618	647740	611656	643051	610710	591462	561593	443837	386494	364900	381014	363896	304042	275225	207743	149992	92838	68156	7261967		1979	1142072	1323533	1252830	1313559	1240002
	Final	1980	579896	667240	650465	666525	644044	610553	599835	485326	414661	380108	396506	365862	282288	245779	170110	102370	49205	27287	7338060		1980	552293	639345	621755	641032	625104	599356	580650	465205	395175	361420	378030	370982	308423	282834	214965	151667	97656	71404	7357296		1980	1132189	1306585	1272220	1307557	1269148
	Final	1981	583218	649103	672237	660779	659839	622410	622253	504178	427182	377330	395549	370137	291847	250145	176029	106191	52056	27784	7448267		1981	556400	620451	644131	636266	642027	607572	604689	484894	406623	358334	379060	370456	321296	286071	225431	154420	102067	74805	7474993		1981	1139618	1269554	1316368	1297045	1301866
	Final	1982	591710	632364	691559	658106	675961	633186	622189	547244	444046	383507	392274	374126	304455	252520	183526	110804	54877	28460	7580914		1982	563564	602921	662868	630888	657440	620449	606385	525999	421757	364815	373833	372136	331697	290317	234522	161037	104974	77731	7603333		1982	1155274	1235285	1354427	1288994	1333401
	Final	1983	600168	619730	700298	654513	684081	641430	625002	582016	457107	393109	385350	379480	319464	251850	190505	115455	57769	29019	7686346		1983	570067	589653	671104	626368	664357	628978	613973	559091	433412	373964	367261	374180	343556	291268	242382	168946	108302	80264	7707126		1983	1170235	1209383	1371402	1280881	1348438
	Final	1984	606912	607747	698260	657856	686831	651692	626848	602769	476031	405161	379923	382518	335472	249381	198959	120540	61115	30197	7778212		1984	576921	578652	667313	629553	665100	639112	619911	579973	452177	385906	362034	374424	356509	288824	252401	176220	112923	83226	7801179		1984	1183833	1186399	1365573	1287409	1351931
	Final	1985	614173	602564	691162	666977	686549	667059	627449	624620	496034	420166	375001	385087	344686	253908	205141	126330	63415	32407	7882728		1985	585383	572567	659692	637729	662902	652448	625206	603016	472483	398492	358042	373937	363859	292431	259198	183980	115408	88811	7905584		1985	1199556	1175131	1350854	1304706	1349451
	Final	1986	619020	604878	672202	688551	680422	681757	635695	641746	520117	433181	376999	384834	351599	266052	209344	132742	66341	34707	8000187		1986	589465	574610	639343	658671	656287	666710	633512	624946	494215	409091	359852	370702	367834	304099	263853	191700	118684	94589	8018163		1986	1208485	1179488	1311545	1347222	1336709
	Final	1987	624156	613563	652775	707760	674452	695993	648765	635293	562328	446665	384641	380371	355396	278905	212901	137670	70367	36254	8118255		1987	594528	582575	619747	678507	652751	682410	646456	624270	535871	421725	368063	367210	368316	316140	267203	198872	123781	97194	8145619		1987	1218684	1196138	1272522	1386267	1327203
	Final	1988	629408	625724	641850	718394	673133	708489	663712	640975	596146	460978	393894	375301	361130	292290	212671	143179	73786	37885	8248945		1988	600143	592628	609278	689280	652686	696117	660797	634476	570015	435251	377382	363529	370065	329320	267519	205862	129058	99813	8283219		1988	1229551	1218352	1251128	1407674	1325819
	Final	1989	637032	637038	636289	722148	677209	717741	681275	649036	619704	482290	405930	371161	364724	306968	212201	149797	77066	39980	8387589		1989	606818	603863	603878	691024	658687	706374	677378	645714	595918	455920	389177	360992	370601	342874	265811	214781	133809	103208	8426827		1989	1243850	1240901	1240167	1413172	1335896
	Final	1990	645231	647321	633992	717426	688523	715830	699153	656292	640461	503478	420262	366929	367815	313789	217888	154537	80776	41566	8511269		1990	612921	614981	600548	684977	669837	706777	694449	656478	618755	478641	400880	359137	370653	348562	270638	220691	139325	105609	8553859		1990	1258152	1262302	1234540	1402403	1358360
	Final	1991	652302	652418	638311	698773	707124	702728	713784	664228	655138	526498	433762	367302	366779	320142	228494	158993	84413	44220	8615409		1991	619401	619790	603308	665301	689640	696935	711951	664159	639133	502647	413172	358648	370089	351248	282261	225502	145415	110027	8668627		1991	1271703	1272208	1241619	1364074	1396764
	Final Recast	1992	658415	655715	642244	677115	723846	692798	725544	675150	652916	561350	445722	373792	362370	324682	239042	161945	88310	47300	8708256		1992	625533	623041	608131	644102	704905	688756	724467	676840	641195	538066	423818	366030	364926	352619	292294	228893	151335	115428	8770379		1992	1283948	1278756	1250375	1321217	1428751
	Final Recast	1993	662243	654171	648741	661526	729572	683466	729883	684410	652319	594671	455025	382818	357344	329264	250148	163045	93064	50270	8781980		1993	628900	622929	614271	629060	709923	679247	729572	686977	646133	571916	433132	375004	358907	354675	302977	229639	158037	121529	8852828		1993	1291143	1277100	1263012	1290586	1439495
	Final Recast	1994	664778	654927	655039	652224	727830	680458	733076	693674	657348	615014	473401	392735	354213	331527	263090	162872	98295	53176	8863677		1994	631107	623677	621243	619931	706915	677151	732766	696154	655470	594394	451716	384526	355876	353443	316404	227190	166739	127089	8941791		1994	1295885	1278604	1276282	1272155	1434745
	Final Recast	1995	664968	660314	661646	647820	721737	688392	728176	708556	663469	633152	494305	405139	352124	333907	269007	168892	102233	56593	8960430		1995	631233	627920	629492	615454	701113	684303	728717	710085	665515	614519	474113	393968	355373	352815	321718	232527	171783	133804	9044452		1995	1296201	1288234	1291138	1263274	1422850
	Final Recast	1996	662765	666388	667360	651540	704790	706329	717855	723767	673445	651628	514981	417797	352091	335788	274750	178711	105336	60003	9065324		1996	628737	634075	635261	620152	683966	703453	720913	726422	676241	637156	494971	405540	354905	352999	325411	242603	175736	140902	9159443		1996	1291502	1300463	1302621	1271692	1388756
	Final Recast	1997	662892	672513	667935	650576	684030	721681	707331	734299	683411	647382	555106	432327	359692	335719	280491	189031	108165	63596	9156177		1997	628456	639529	637066	619415	665351	721422	712581	739458	688647	639732	534489	418970	361729	350416	326911	255124	178927	148637	9266860		1997	1291348	1312042	1305001	1269991	1349381
	Final Recast	1998	659846	678648	669025	654333	666781	726757	698912	742592	691245	651752	588896	446539	369909	333578	286711	199609	110161	67849	9243143		1998	625240	645201	638561	623366	647861	728840	705818	748763	698890	650374	569538	431030	370363	347086	329223	267311	181053	155923	9364441		1998	1285086	1323849	1307586	1277699	1314642
	Final Recast	1999	656573	684584	673203	661460	654635	724828	697610	746944	702161	658616	610701	466293	382630	331808	292814	210930	111946	72373	9340109		1999	623110	649805	642777	631458	636013	727526	707052	753976	710623	661719	594449	449965	381927	344044	331349	279199	181998	165165	9472155		1999	1279683	1334389	1315980	1292918	1290648
	Final Recast	2000	653221	688195	680131	671954	649535	716339	704211	744059	715742	663238	630498	487075	398235	329907	297685	218191	118211	77038	9443465		2000	620507	653189	648099	643833	630318	721080	714004	752101	724739	670207	619246	470468	394318	342887	331527	285927	188803	174084	9585337		2000	1273728	1341384	1328230	1315787	1279853
	Final Recast	2001	653053	689098	688396	684154	654544	694298	722451	736877	729922	670907	648130	509420	411183	333321	301501	225821	127383	81367	9561826		2001	620632	653425	655629	655832	635585	699510	735150	746155	740243	679338	643855	492559	405285	344577	332562	290027	200436	182075	9712875		2001	1273685	1342523	1344025	1339986	1290129
	Final Recast	2002	650563	686788	695811	689986	668791	682089	738914	728346	745106	681079	644584	545884	423058	341402	301422	231304	135732	84624	9675483		2002	618479	650643	662322	661925	646892	681715	751776	737748	755459	689625	643712	532020	416226	352056	329725	292051	209425	187928	9819727		2002	1269042	1337431	1358133	1351911	1315683
	Final Recast	2003	650616	682601	703262	693648	686750	676288	747724	720877	755254	692759	647251	578102	433865	350695	299204	237596	143958	87147	9787597		2003	618520	647081	667589	666720	663262	673022	761226	730935	765722	702917	650127	566080	427212	360951	325975	294773	218712	192316	9933140		2003	1269136	1329682	1370851	1360368	1350012
	Final Recast	2004	651502	679483	708387	697859	703491	675089	748782	720531	759473	706985	652232	597807	450490	361124	297740	243017	152166	89793	9895951		2004	618674	645030	671148	670030	677235	668629	760318	730858	770759	717332	657784	589127	444830	371550	322990	296501	227491	196485	10036771		2004	1270176	1324513	1379535	1367889	1380726
	Final Recast	2005	656043	677441	710978	705932	719854	680687	745033	729890	758248	719486	658928	615600	469508	372941	297039	247212	158302	96511	10019633		2005	621496	643600	673833	673600	694794	671866	755485	738508	769398	731606	666528	610845	465778	381924	322067	296617	233586	205680	10157211		2005	1277539	1321041	1384811	1379532	1414648
	Final Recast	2006	664456	678901	710385	714616	736418	696211	733918	749952	752965	731592	670162	628894	490907	382035	300343	249995	164408	103266	10159424		2006	630082	645407	673156	678066	712017	685377	740226	758876	763479	746140	677673	629098	487928	391086	323789	296686	237030	215426	10291542		2006	1294538	1324308	1383541	1392682	1448435
	Final	2007	686251	680272	709912	729591	757626	722526	726262	772462	746834	747698	681898	625668	528732	397118	308311	251339	170213	110923	10353636		2007	650228	647292	672906	691130	725515	708492	730822	783223	757398	762152	691160	628525	526437	403520	331936	296371	240666	226213	10473986		2007	1336479	1327564	1382818	1420721	1483141
	Final	2008	710252	683671	710306	743757	782937	759647	728006	788745	744638	762004	693355	631294	559927	410907	317663	251539	176055	117342	10572045		2008	672841	651012	672814	703855	743425	740361	730338	800808	754771	775819	704460	637301	557688	416253	340214	295393	244587	235214	10677154		2008	1383093	1334683	1383120	1447612	1526362
	Final	2009	731969	689986	711605	751442	813622	801314	738309	796271	750450	770435	709117	639246	579498	430379	329642	252539	180966	124007	10800797		2009	693715	656114	674651	710996	767754	775995	738068	808009	761613	783995	720965	647926	578022	435484	350656	295026	247645	244222	10890856		2009	1425684	1346100	1386256	1462438	1581376
	Final	2010	746322	697910	710019	749321	824068	826369	749576	794307	762854	770567	723754	648777	597038	451241	344030	253763	186331	131584	10967831		2010	707690	662272	674485	710727	780986	800887	748621	806239	774248	784237	736829	659626	597346	457154	360864	296045	250653	255010	11063919		2010	1454012	1360182	1384504	1460048	1605054
	Final	2011	748527	712205	711543	746599	823470	841084	769211	782204	786748	764147	739627	662069	611198	474253	357296	258411	190572	139070	11118234		2011	709587	675429	676322	706860	788193	817086	766950	791706	800496	777690	754436	673924	614802	480007	370375	299930	253460	264537	11221790		2011	1458114	1387634	1387865	1453459	1611663
	Revised	2012	764555	729260	713342	750636	829036	859142	798496	774856	810275	759390	754013	675708	608182	508032	371058	267237	192716	146889	11312823		2012	724790	690320	678260	709039	794895	837419	792658	781494	825253	773305	769697	690394	615828	515590	384367	305669	253075	273378	11415431		2012	1489345	1419580	1391602	1459675	1623931
	Preliminary	2013	779400	747632	716560	754891	837481	872594	832390	773743	823343	758558	765194	688273	614526	536528	383345	277443	194440	155207	11511548		2013	737835	707439	682048	712163	801679	854109	823872	778778	839053	771842	782299	705915	626749	544721	398442	312544	252732	282100	11614320		2013	1517235	1455071	1398608	1467054	1639160
	Preliminary	2014	784542	764441	721502	758254	845407	883361	859800	778307	826914	763678	771725	703484	623689	555407	401418	289632	196036	164903	11692500		2014	742996	723729	685676	716889	806820	867987	852293	782010	840861	777841	789726	722287	640329	564674	417816	322410	252262	291630	11798236		2014	1527538	1488170	1407178	1475143	1652227
		2015																					2015																					2015
		2016																					2016																					2016
		2017																					2017																					2017
		2018																					2018																					2018
		2019																					2019																					2019
		2020																					2020																					2020
		2021																					2021																					2021
		2022																					2022																					2022
		2023																					2023																					2023
		2024																					2024																					2024
		2025																					2025																					2025
[truncated: 15 more columns]

## Sheet: Admin
	Motor neurone disease (ICD-10 G12.2), 1959–2013
	Admin page			SAS output reference:
	Yellow = enter new values when updating			GRIM0605	Final data up to	2011
	Green = indicates Excel-driven values			GRIM_output_3.xls	Revised data for	2012
	Name for the title	ICD-10 code(s)	Start Year	[GRIM_output_3.xls]GRIM0605	Preliminary data for	2013
	Motor neurone disease	G12.2	1959		Year of publication	2015
	Name of the chapter	ICD-10 code(s)	Latest year	Latest year row for deaths & rates	Suggested citation:	Australian Institute of Health and Welfare (AIHW) 2015. GRIM (General Record of Incidence of Mortality) books 2013: Motor neurone disease. Canberra: AIHW.
	All diseases of the nervous system	G00–G99	2013	120
	ICD codes				Age group	Age group #
	ICD-1 1907–1917				0–4	1
	ICD-2 1918–1921				5–9	2
	ICD-3 1922–1930				10–14	3
	ICD-4 1931–1939				15–19	4
	ICD-5 1940–1949				20–24	5
	ICD-6 1950–1957				25–29	6
	ICD-7 1958–1967	356			30–34	7
	ICD-8 1968–1978	348			35–39	8
	ICD-9 1979–1996	335.2			40–44	9
	ICD-10 1997–	G12.2			45–49	10
			Year selector for summary tables		50–54	11
	Special notes		First cell address	Admin!$B$109	55–59	12
	None.		Last cell address	$B$163	60–64	13
	Comparability factor notes	Comparability factor	Range	Admin!$B$109:$B$163	65–69	14
	None.	1.13			70–74	15
					75–79	16
	Graphs:				80–84	17
					85+	18
1	Age-specific death rates for Motor neurone disease (ICD-10 G12.2), by sex, 2013
	Age group (years)	0–4	5–9	10–14	15–19	20–24	25–29	30–34	35–39	40–44	45–49	50–54	55–59	60–64	65–69	70–74	75–79	80–84	85+
	Males rate	0.256608	0	0	0	0	0.114601	0	0.387726	0.850192	2.10927	2.09097	5.23048	6.67181	9.31918	15.9126	25.5908	26.2292	21.9062
	Females rate	0	0	0	0	0	0	0.121378	0.256813	0.238364	0.12956	1.27828	3.82482	6.70125	8.99543	13.0508	16.9576	18.2011	13.1159
2	Number of deaths due to Motor neurone disease (ICD-10 G12.2), by sex and age group, 2013
	Age group (years)	0–4	5–9	10–14	15–19	20–24	25–29	30–34	35–39	40–44	45–49	50–54	55–59	60–64	65–69	70–74	75–79	80–84	85+	Total
	Males count	2	0	0	0	0	1	0	3	7	16	16	36	41	50	61	71	51	34	389
	Females count	0	0	0	0	0	0	1	2	2	1	10	27	42	49	52	53	46	37	322
	(Formatted for deaths pyramid)
	Males count	-2	0	0	0	0	-1	0	-3	-7	-16	-16	-36	-41	-50	-61	-71	-51	-34
	Females count	0	0	0	0	0	0	1	2	2	1	10	27	42	49	52	53	46	37
3	Number of deaths due to Motor neurone disease (ICD-10 G12.2), by sex and year, 1959–2013
4	Age-standardised death rates for Motor neurone disease (ICD-10 G12.2), by sex and year, 1959–2013
	Year	Males deaths	Females deaths	Persons deaths	Males age-standardised rate	Females age-standardised rate	Persons age-standardised rate
	1900
	1901
	1902
	1903
	1904
	1905
	1906
	1907
	1908
	1909
	1910
	1911
	1912
	1913
	1914
	1915
	1916
	1917
	1918
	1919
	1920
	1921
	1922
	1923
	1924
	1925
	1926
	1927
	1928
	1929
	1930
	1931
	1932
	1933
	1934
	1935
	1936
	1937
	1938
	1939
	1940
	1941
	1942
	1943
	1944
	1945
	1946
	1947
	1948
	1949
	1950
	1951
	1952
	1953
	1954
	1955
	1956
	1957
	1958
	1959	63	40	103	1.70697	0.945607	1.29251
	1960	70	38	108	1.81139	0.874245	1.30609
	1961	54	30	84	1.31493	0.683153	0.994984
	1962	56	42	98	1.37012	0.878302	1.10053
	1963	51	35	86	1.22291	0.76639	0.983099
	1964	73	46	119	1.65668	0.972106	1.291
	1965	64	45	109	1.50672	0.895441	1.16595
	1966	67	29	96	1.57486	0.571754	1.0221
	1967	58	50	108	1.24886	0.951449	1.0862
	1968	77	53	130	1.79488	1.04079	1.36496
	1969	67	49	116	1.57305	0.961203	1.219
	1970	57	42	99	1.29864	0.816356	1.03299
	1971	76	50	126	1.60056	0.895672	1.21255
	1972	66	55	121	1.41138	0.986256	1.17471
	1973	84	59	143	1.89998	1.03064	1.38812
	1974	79	57	136	1.54963	0.938785	1.19629
	1975	105	76	181	2.06863	1.27	1.61722
	1976	97	54	151	1.98214	0.889498	1.36051
	1977	95	62	157	1.80565	1.00759	1.37426
	1978	74	78	152	1.39962	1.18487	1.27509
	1979	107	71	178	2.01627	1.09719	1.49424
	1980	127	88	215	2.40417	1.31547	1.7801
	1981	108	92	200	1.95331	1.36798	1.64824
	1982	116	114	230	2.0711	1.63522	1.82158
	1983	121	101	222	2.07517	1.40508	1.70749
	1984	117	94	211	1.98631	1.33875	1.63233
	1985	154	116	270	2.53197	1.56357	2.00135
	1986	119	119	238	1.99341	1.55362	1.73659
	1987	136	134	270	2.19262	1.71404	1.90306
	1988	178	110	288	2.86755	1.4047	2.0284
	1989	172	148	320	2.71054	1.85484	2.21373
	1990	183	121	304	2.69786	1.48645	2.02105
	1991	150	132	282	2.27885	1.55167	1.83543
	1992	176	149	325	2.58495	1.72127	2.10489
	1993	191	144	335	2.66152	1.63828	2.07654
	1994	204	151	355	2.82446	1.67907	2.18132
	1995	209	163	372	2.79356	1.78352	2.24188
	1996	211	130	341	2.82153	1.38845	2.00537
	1997	175	192	367	2.23927	2.00975	2.10124
	1998	231	200	431	2.96928	2.03047	2.43088
	1999	251	184	435	3.05409	1.83732	2.36865
	2000	253	204	457	3.08006	1.96718	2.44152
	2001	280	191	471	3.28336	1.81521	2.44262
	2002	294	207	501	3.28477	1.93824	2.53741
	2003	275	255	530	2.9634	2.33101	2.63423
	2004	273	234	507	2.92641	2.12552	2.47743
	2005	273	226	499	2.86133	1.97377	2.35285
	2006	294	239	533	2.97558	2.07664	2.48146
	2007	341	254	595	3.3456	2.12552	2.6852
	2008	343	268	611	3.24262	2.20652	2.68702
	2009	366	233	599	3.34631	1.86316	2.56844
	2010	366	282	648	3.30636	2.2336	2.71424
	2011	391	286	677	3.4333	2.14118	2.73978
	2012	390	288	678	3.2965	2.1327	2.65813
	2013	389	322	711	3.24262	2.31201	2.74183
		Note: 0s appearing in columns C-H above, where there is no year written, do not represent actual zeros. They indicate that there is no data entered yet for those years.
	Summary tables:
	Average annual and total change in mortality rates
					Males	Females	Persons
	Year 1	1959		Rate 1	1.70697	0.945607	1.29251
	Year 2	2013		Rate 2	3.24262	2.31201	2.74183
				Per cent total change	0.899631	1.445	1.12132
	Year 2 - Year 1	54		Per cent annual change	0.0119535	0.0166942	0.0140241
	Year selection error	N
	Years same	N
	Year(s) displayed as:	1959 – 2013
	Note:
	Average annual change in mortality rates indicates the extent of change in age-standardised rates over time. The rates are expressed as a per cent change per year. A negative number indicates a decrease. Care should be taken when interpreting total change in mortality rates, as one or both selected years may have had an unusually high or low number of deaths.
	Title options:
	Average annual and total change in mortality rates for Motor neurone disease (ICD-10 G12.2) in Australia, 1959–2013.
	Please ensure that the first year is earlier than the last year.
	Title selection:
	Average annual and total change in mortality rates for Motor neurone disease (ICD-10 G12.2) in Australia, 1959–2013.
	Aggregated age-specific mortality rates
					Males	Females	Persons
	Year 1	1959	Deaths	Address Start	'[Laidlaw et al MND Paper Supplemental File 1.xlsx]Deaths'!$C$66	'[Laidlaw et al MND Paper Supplemental File 1.xlsx]Deaths'!$Y$66	'[Laidlaw et al MND Paper Supplemental File 1.xlsx]Deaths'!$AU$66
	Year 2	2013		Address End	'[Laidlaw et al MND Paper Supplemental File 1.xlsx]Deaths'!$T$120	'[Laidlaw et al MND Paper Supplemental File 1.xlsx]Deaths'!$AP$120	'[Laidlaw et al MND Paper Supplemental File 1.xlsx]Deaths'!$BL$120
				Sum of Deaths	9397	7232	16629
	Age group 1	0–4
	Age group 2	85+	Population	Address Start	'[Laidlaw et al MND Paper Supplemental File 1.xlsx]Populations'!$D$75	'[Laidlaw et al MND Paper Supplemental File 1.xlsx]Populations'!$Y$75	'[Laidlaw et al MND Paper Supplemental File 1.xlsx]Populations'!$AT$75
				Address End	'[Laidlaw et al MND Paper Supplemental File 1.xlsx]Populations'!$U$129	'[Laidlaw et al MND Paper Supplemental File 1.xlsx]Populations'!$AP$129	'[Laidlaw et al MND Paper Supplemental File 1.xlsx]Populations'!$BK$129
	Age group 1 number	1		Sum of Population	443452059	444834152	888286211
	Age group 2 number	18
			Rate per 100,000		2.11906	1.62577	1.87203
	Year selection error	N
	Years same	N
	Year(s) displayed as:	1959 – 2013
	Note:
	Provides an age-specific mortality rate (per 100,000 population) for selected range of years and age groups.
	Title options:
	Age-specific mortality rates (per 100,000 population) for Motor neurone disease (ICD-10 G12.2) in Australia, 1959–2013, 0–4 to 85+ years.
	Age-specific mortality rates (per 100,000 population) for Motor neurone disease (ICD-10 G12.2) in Australia, 1959, 0–4 to 85+ years.
	Age-specific mortality rates (per 100,000 population) for Motor neurone disease (ICD-10 G12.2) in Australia, 1959–2013, 0–4 years.
	Age-specific mortality rates (per 100,000 population) for Motor neurone disease (ICD-10 G12.2) in Australia, 1959, 0–4 years.
	Please ensure that the youngest age group is younger or equal to the oldest age group.
	Please ensure that the first year is earlier than the last year.
	Title selection:
	Age-specific mortality rates (per 100,000 population) for Motor neurone disease (ICD-10 G12.2) in Australia, 1959–2013, 0–4 to 85+ years.
