# Supplementary material for: A Temporal Association between Accumulated Petrol (Gasoline) Lead Emissions and Motor Neuron Disease in Australia
Source: Int J Environ Res Public Health. 2015 Dec 19;12(12):16124–35. doi: 10.3390/ijerph121215047 (PMC4690983; doi:10.3390/ijerph121215047)
Supplement: Supplementary File 2 [file ijerph-12-15047-s002.xlsx]

## Sheet: Data
Year	MND Percent All Causes of Death (male and female combined)	Male MND Age-standardised Death Rate per 100,000	Female MND Age-standardised Death Rate per 100,000		Year	Year + 20	Air Lead Emissions (tonnes)	Cumulative Air Lead Emissions (tonnes)		Year	Air Lead Emissions (tonnes)									Year	Cumulative Air Lead Emissions (tonnes)
1959	0.115455	1.70697	0.945607		1933	1953	493.7	493.7		1933	493.7									1933	493.7
1960	0.122084	1.81139	0.874245		1934	1954	567.4	1061.1		1934	567.4									1934	1061.1
1961	0.0944234	1.31493	0.683153		1935	1955	578.3	1639.4		1935	578.3									1935	1639.4
1962	0.105192	1.37012	0.878302		1936	1956	695.6	2335		1936	695.6									1936	2335
1963	0.0906274	1.22291	0.76639		1937	1957	769.2	3104.2		1937	769.2									1937	3104.2
1964	0.118297	1.65668	0.972106		1938	1958	907.8	4012		1938	907.8									1938	4012
1965	0.109312	1.50672	0.895441		1939	1959	954.7	4966.7		1939	954.7									1939	4966.7
1966	0.0923708	1.57486	0.571754		1940	1960				1940										1940
1967	0.105158	1.24886	0.951449		1941	1961				1941										1941
1968	0.11867	1.79488	1.04079		1942	1962	722.8	5689.5		1942	722.8									1942	5689.5
1969	0.108924	1.57305	0.961203		1943	1963	946.5	6636		1943	946.5									1943	6636
1970	0.0875734	1.29864	0.816356		1944	1964	1014.7	7650.7		1944	1014.7									1944	7650.7
1971	0.113873	1.60056	0.895672		1945	1965	782.8	8433.5		1945	782.8									1945	8433.5
1972	0.110241	1.41138	0.986256		1946	1966	1012	9445.5		1946	1012									1946	9445.5
1973	0.129036	1.89998	1.03064		1947	1967	973.8	10419.3		1947	973.8									1947	10419.3
1974	0.11741	1.54963	0.938785		1948	1968	1102	11521.3		1948	1102									1948	11521.3
1975	0.166023	2.06863	1.27		1949	1969	1236.8	12758.1		1949	1236.8									1949	12758.1
1976	0.134029	1.98214	0.889498		1950	1970	1411.5	14169.6		1950	1411.5									1950	14169.6
1977	0.144315	1.80565	1.00759		1951	1971	1731.6	15901.2		1951	1731.6									1951	15901.2
1978	0.140189	1.39962	1.18487		1952	1972	1868.8	17770		1952	1868.8									1952	17770
1979	0.167029	2.01627	1.09719		1953	1973	1958.9	19728.9		1953	1958.9									1953	19728.9
1980	0.197801	2.40417	1.31547		1954	1974	2179.4	21908.3		1954	2179.4									1954	21908.3
1981	0.183481	1.95331	1.36798		1955	1975	2403.5	24311.8		1955	2403.5									1955	24311.8
1982	0.200399	2.0711	1.63522		1956	1976	2604.3	26916.1		1956	2604.3									1956	26916.1
1983	0.201664	2.07517	1.40508		1957	1977	2747.7	29663.8		1957	2747.7									1957	29663.8
1984	0.191968	1.98631	1.33875		1958	1978	3028.7	32692.5		1958	3028.7									1958	32692.5
1985	0.227257	2.53197	1.56357		1959	1979	3267.9	35960.4		1959	3267.9									1959	35960.4
1986	0.206991	1.99341	1.55362		1960	1980	3546.3	39506.7		1960	3546.3									1960	39506.7
1987	0.230142	2.19262	1.71404		1961	1981	3689.2	43195.9		1961	3689.2									1961	43195.9
1988	0.240272	2.86755	1.4047		1962	1982	3959.9	47155.8		1962	3959.9									1962	47155.8
1989	0.257583	2.71054	1.85484		1963	1983	4243.7	51399.5		1963	4243.7									1963	51399.5
1990	0.253207	2.69786	1.48645		1964	1984	4604.1	56003.6		1964	4604.1									1964	56003.6
1991	0.236684	2.27885	1.55167		1965	1985	4884.3	60887.9		1965	4884.3									1965	60887.9
1992	0.262817	2.58495	1.72127		1966	1986	5073.5	65961.4		1966	5073.5									1966	65961.4
1993	0.275496	2.66152	1.63828		1967	1987	5350.3	71311.7		1967	5350.3									1967	71311.7
1994	0.280207	2.82446	1.67907		1968	1988	5660.2	76971.9		1968	5660.2									1968	76971.9
1995	0.297284	2.79356	1.78352		1969	1989	6060.1	83032		1969	6060.1									1969	83032
1996	0.264918	2.82153	1.38845		1970	1990	6412.6	89444.6		1970	6412.6									1970	89444.6
1997	0.283726	2.23927	2.00975		1971	1991	6744.9	96189.5		1971	6744.9									1971	96189.5
1998	0.338831	2.96928	2.03047		1972	1992	7075.3	103265		1972	7075.3									1972	103265
1999	0.339573	3.05409	1.83732		1973	1993	7615.8	110881		1973	7615.8									1973	110881
2000	0.356221	3.08006	1.96718		1974	1994	7869.1	118750		1974	7869.1									1974	118750
2001	0.366412	3.28336	1.81521		1975	1995	7034.5	125784		1975	7034.5									1975	125784
2002	0.3747	3.28477	1.93824		1976	1996	7207.8	132992		1976	7207.8									1976	132992
2003	0.400629	2.9634	2.33101		1977	1997	6751	139743		1977	6751									1977	139743
2004	0.382618	2.92641	2.12552		1978	1998	6941.7	146685		1978	6941.7									1978	146685
2005	0.38175	2.86133	1.97377		1979	1999	6909.9	153595		1979	6909.9									1979	153595
2006	0.398537	2.97558	2.07664		1980	2000	6793.8	160388		1980	6793.8									1980	160388
2007	0.431616	3.3456	2.12552		1981	2001	6851.6	167240		1981	6851.6									1981	167240
2008	0.424465	3.24262	2.20652		1982	2002	6893.4	174133		1982	6893.4									1982	174133
2009	0.425547	3.34631	1.86316		1983	2003	6871.7	181005		1983	6871.7									1983	181005
2010	0.451653	3.30636	2.2336		1984	2004	6380.3	187385		1984	6380.3									1984	187385
2011	0.460757	3.4333	2.14118		1985	2005	6314.2	193700		1985	6314.2									1985	193700
2012	0.460917	3.2965	2.1327		1986	2006	6096.5	199796		1986	6096.5									1986	199796
2013	0.481453	3.24262	2.31201		1987	2007	5898.5	205695		1987	5898.5									1987	205695
					1988	2008	5688.6	211383		1988	5688.6									1988	211383
					1989	2009	5394.1	216777		1989	5394.1									1989	216777
					1990	2010	4925.3	221703		1990	4925.3									1990	221703
					1991	2011	4494	226197		1991	4494									1991	226197
					1992	2012	4247.3	230444		1992	4247.3									1992	230444
					1993	2013	3757.8	234202		1993	3757.8									1993	234202
					1994	2014	2055.5	236257		1994	2055.5									1994	236257
					1995	2015	1066.3	237323		1995	1066.3									1995	237323
					1996	2016	847	238170		1996	847									1996	238170
					1997	2017	740.8	238911		1997	740.8									1997	238911
					1998	2018	502.4	239414		1998	502.4									1998	239414
					1999	2019	427.2	239841		1999	427.2									1999	239841
					2000	2020	333.6	240174		2000	333.6									2000	240174
					2001	2021	237.6	240412		2001	237.6									2001	240412
					2002	2022	98.8	240511		2002	98.8									2002	240511
Year	Male	Female
1959	1.70697	0.945607
1960	1.81139	0.874245
1961	1.31493	0.683153
1962	1.37012	0.878302
1963	1.22291	0.76639
1964	1.65668	0.972106
1965	1.50672	0.895441
1966	1.57486	0.571754
1967	1.24886	0.951449
1968	1.79488	1.04079
1969	1.57305	0.961203
1970	1.29864	0.816356
1971	1.60056	0.895672
1972	1.41138	0.986256
1973	1.89998	1.03064
1974	1.54963	0.938785
1975	2.06863	1.27
1976	1.98214	0.889498
1977	1.80565	1.00759
1978	1.39962	1.18487
1979	2.01627	1.09719
1980	2.40417	1.31547
1981	1.95331	1.36798
1982	2.0711	1.63522
1983	2.07517	1.40508
1984	1.98631	1.33875
1985	2.53197	1.56357
1986	1.99341	1.55362
1987	2.19262	1.71404
1988	2.86755	1.4047
1989	2.71054	1.85484
1990	2.69786	1.48645
1991	2.27885	1.55167
1992	2.58495	1.72127
1993	2.66152	1.63828
1994	2.82446	1.67907
1995	2.79356	1.78352
1996	2.82153	1.38845
1997	2.23927	2.00975
1998	2.96928	2.03047
1999	3.05409	1.83732
2000	3.08006	1.96718
2001	3.28336	1.81521
2002	3.28477	1.93824
2003	2.9634	2.33101
2004	2.92641	2.12552
2005	2.86133	1.97377
2006	2.97558	2.07664
2007	3.3456	2.12552
2008	3.24262	2.20652
2009	3.34631	1.86316
2010	3.30636	2.2336
2011	3.4333	2.14118
2012	3.2965	2.1327
2013	3.24262	2.31201

## Sheet: %All Cause Death Data
Year	Percent All Cause Death	Cumulative Air Lead Emissions (tonnes)
1962	0.105192	5689.5
1963	0.0906274	6636
1964	0.118297	7650.7
1965	0.109312	8433.5
1966	0.0923708	9445.5
1967	0.105158	10419.3
1968	0.11867	11521.3
1969	0.108924	12758.1
1970	0.0875734	14169.6
1971	0.113873	15901.2
1972	0.110241	17770
1973	0.129036	19728.9
1974	0.11741	21908.3
1975	0.166023	24311.8
1976	0.134029	26916.1
1977	0.144315	29663.8
1978	0.140189	32692.5
1979	0.167029	35960.4
1980	0.197801	39506.7
1981	0.183481	43195.9
1982	0.200399	47155.8
1983	0.201664	51399.5
1984	0.191968	56003.6
1985	0.227257	60887.9
1986	0.206991	65961.4
1987	0.230142	71311.7
1988	0.240272	76971.9
1989	0.257583	83032
1990	0.253207	89444.6
1991	0.236684	96189.5
1992	0.262817	103265
1993	0.275496	110881
1994	0.280207	118750
1995	0.297284	125784
1996	0.264918	132992
1997	0.283726	139743
1998	0.338831	146685
1999	0.339573	153595
2000	0.356221	160388
2001	0.366412	167240
2002	0.3747	174133
2003	0.400629	181005
2004	0.382618	187385
2005	0.38175	193700
2006	0.398537	199796
2007	0.431616	205695
2008	0.424465	211383
2009	0.425547	216777
2010	0.451653	221703
2011	0.460757	226197
2012	0.460917	230444
2013	0.481453	234202

## Sheet: %AllCauseDeathRegression
SUMMARY OUTPUT
Regression Statistics
Multiple R	0.990101
R Square	0.980299
Adjusted R Square	0.979905
Standard Error	0.0171993
Observations	52
ANOVA
	df	SS	MS	F	Significance F
Regression	1	0.735971	0.735971	2487.95	2.60993e-44
Residual	50	0.0147907	0.000295815
Total	51	0.750762
	Coefficients	Standard Error	t Stat	P-value	Lower 95%	Upper 95%	Lower 95.0%	Upper 95.0%
Intercept	0.0999709	0.00381637	26.1953	7.31836e-31	0.0923055	0.107636	0.0923055	0.107636
X Variable 1	1.56602e-06	3.13963e-08	49.8793	2.60993e-44	1.50296e-06	1.62909e-06	1.50296e-06	1.62909e-06

## Sheet:  Female 
Year	Female Age Standardised Rate (per 100,000)	Cumulative Air Lead Emissions (tonnes)
1962	0.878302	5689.5
1963	0.76639	6636
1964	0.972106	7650.7
1965	0.895441	8433.5
1966	0.571754	9445.5
1967	0.951449	10419.3
1968	1.04079	11521.3
1969	0.961203	12758.1
1970	0.816356	14169.6
1971	0.895672	15901.2
1972	0.986256	17770
1973	1.03064	19728.9
1974	0.938785	21908.3
1975	1.27	24311.8
1976	0.889498	26916.1
1977	1.00759	29663.8
1978	1.18487	32692.5
1979	1.09719	35960.4
1980	1.31547	39506.7
1981	1.36798	43195.9
1982	1.63522	47155.8
1983	1.40508	51399.5
1984	1.33875	56003.6
1985	1.56357	60887.9
1986	1.55362	65961.4
1987	1.71404	71311.7
1988	1.4047	76971.9
1989	1.85484	83032
1990	1.48645	89444.6
1991	1.55167	96189.5
1992	1.72127	103265
1993	1.63828	110881
1994	1.67907	118750
1995	1.78352	125784
1996	1.38845	132992
1997	2.00975	139743
1998	2.03047	146685
1999	1.83732	153595
2000	1.96718	160388
2001	1.81521	167240
2002	1.93824	174133
2003	2.33101	181005
2004	2.12552	187385
2005	1.97377	193700
2006	2.07664	199796
2007	2.12552	205695
2008	2.20652	211383
2009	1.86316	216777
2010	2.2336	221703
2011	2.14118	226197
2012	2.1327	230444
2013	2.31201	234202

## Sheet: FemaleRegression
SUMMARY OUTPUT
Regression Statistics
Multiple R	0.927683
R Square	0.860596
Adjusted R Square	0.857808
Standard Error	0.183736
Observations	52
ANOVA
	df	SS	MS	F	Significance F
Regression	1	10.4204	10.4204	308.67	4.87986e-23
Residual	50	1.68795	0.033759
Total	51	12.1084
	Coefficients	Standard Error	t Stat	P-value	Lower 95%	Upper 95%	Lower 95.0%	Upper 95.0%
Intercept	0.953837	0.0407695	23.3958	1.37013e-28	0.871949	1.03572	0.871949	1.03572
X Variable 1	5.89265e-06	3.354e-07	17.569	4.87986e-23	5.21898e-06	6.56632e-06	5.21898e-06	6.56632e-06

## Sheet: Male 
Year	Male Age Standardised Rate (per 100,000)	Cumulative Air Lead Emissions (tonnes)
1962	1.37012	5689.5
1963	1.22291	6636
1964	1.65668	7650.7
1965	1.50672	8433.5
1966	1.57486	9445.5
1967	1.24886	10419.3
1968	1.79488	11521.3
1969	1.57305	12758.1
1970	1.29864	14169.6
1971	1.60056	15901.2
1972	1.41138	17770
1973	1.89998	19728.9
1974	1.54963	21908.3
1975	2.06863	24311.8
1976	1.98214	26916.1
1977	1.80565	29663.8
1978	1.39962	32692.5
1979	2.01627	35960.4
1980	2.40417	39506.7
1981	1.95331	43195.9
1982	2.0711	47155.8
1983	2.07517	51399.5
1984	1.98631	56003.6
1985	2.53197	60887.9
1986	1.99341	65961.4
1987	2.19262	71311.7
1988	2.86755	76971.9
1989	2.71054	83032
1990	2.69786	89444.6
1991	2.27885	96189.5
1992	2.58495	103265
1993	2.66152	110881
1994	2.82446	118750
1995	2.79356	125784
1996	2.82153	132992
1997	2.23927	139743
1998	2.96928	146685
1999	3.05409	153595
2000	3.08006	160388
2001	3.28336	167240
2002	3.28477	174133
2003	2.9634	181005
2004	2.92641	187385
2005	2.86133	193700
2006	2.97558	199796
2007	3.3456	205695
2008	3.24262	211383
2009	3.34631	216777
2010	3.30636	221703
2011	3.4333	226197
2012	3.2965	230444
2013	3.24262	234202

## Sheet: MaleRegression
SUMMARY OUTPUT
Regression Statistics
Multiple R	0.925679
R Square	0.856882
Adjusted R Square	0.854019
Standard Error	0.262565
Observations	52
ANOVA
	df	SS	MS	F	Significance F
Regression	1	20.638	20.638	299.362	9.4365e-23
Residual	50	3.44701	0.0689402
Total	51	24.085
	Coefficients	Standard Error	t Stat	P-value	Lower 95%	Upper 95%	Lower 95.0%	Upper 95.0%
Intercept	1.58385	0.0582609	27.1855	1.28978e-31	1.46683	1.70087	1.46683	1.70087
X Variable 1	8.29282e-06	4.79297e-07	17.3021	9.4365e-23	7.33013e-06	9.25552e-06	7.33013e-06	9.25552e-06
